# Supplementary material for: Comparative sensitivity evaluation for 122 CE-marked rapid diagnostic tests for SARS-CoV-2 antigen, Germany, September 2020 to April 2021
Source: PubMed Central journal article supplement (PMC8569926; doi:10.2807/1560-7917.es.2021.26.44.2100441), 2021-11-04
Supplement: 21-00441_NUEBLING_Supplement.pdf [file 21-00441_NUEBLING_Supplement.pdf]

## **Design and manufacture of the evaluation panel**

To enable the systematic and comparable decentralized evaluation of numerous RDTs, a panel of 50 samples was compiled by pooling a total of approximately 500 upper respiratory specimens from symptomatic patients which had been collected between March and September 2020 (Panel 1V1). For pooling, dry swabs resuspended in PBS were used, with only a low number of swabs obtained in medium, resulting in a final concentration of medium in pools of  $\leq 20\%$  for each pool,  $\leq 10\%$  for 38 pools and 0% medium for 25 pools.

Subsequently, up to ten respiratory specimens obtained for routine diagnostics with different virus loads as determined by real-time PCR were pooled and diluted to a defined RNA load in PBS. Pools were frozen at  $-80\text{ }^{\circ}\text{C}$ . Real-time PCR was applied to determine the RNA load per pool. *In vitro* RNA (provided by the World Health Organisation WHO) as well as the quantitative reference material provided by INSTAND were used for quantification (<https://www.instand-ev.de>). Finally, the panel covered a range of SARS-CoV-2 RNA from  $1.1 \times 10^9$  genomes per mL down to 420 genomes per mL. When Panel 1V1 was used up, new pools were generated by diluting the same samples as for Panel 1V1 (except for 4 pools 1–4 that had to be constituted from new clinical specimens collected between October 2020 and January 2021), resulting in comparable virus loads as determined by real-time PCR, and the panel was labelled Panel 1V2. Additionally, panel 1V1 was compared to Panel 1V2 with RDT #3 and RDT #31 and showed identical results. Panel 1V1 and Panel 1V2 have been extensively used to evaluate the sensitivity of 122 RDTs. As negative control respiratory specimens obtained by swabbing SARS-CoV-2-negative patients were pooled.

Previous studies revealed that a minimal RNA genome copy number of  $10^6$  genome copies per mL of specimen represents an amount of infectious virus particles which is required for

successful virus propagation in cell culture. To correlate the pools to potential infectivity by a specimen, we subjected the pools with  $\geq 10^6$  genome copies per mL, corresponding to a Cq value  $< 25$ , to cell culture. Confirmation of replication-competent SARS-CoV-2 was achieved by inoculation of VeroE6 cells with the respective pools. Pools containing infectious SARS-CoV-2 were subsequently titrated on VeroE6 cells. However, even if pools containing higher amounts of SARS-CoV-2 RNA showed generally higher titres than those with lower genome numbers, we observed no significant correlation between the genome load and the titre (data not shown).

The specifications of the 50 pools are listed in the Table below; pools allowing SARS-CoV-2 propagation are marked in bold.

**Table: Characteristics of the 50 pools constituting Panel 1V1 and Panel 1V2**

| Panel 1V1 |                     |                              | Panel 1V2 |                     |                              |
|-----------|---------------------|------------------------------|-----------|---------------------|------------------------------|
| Pool No.  | Cq/5 $\mu$ L of RNA | RNA copies subjected to test | Pool No.  | Cq/5 $\mu$ L of RNA | RNA copies subjected to test |
| 1         | <b>17.55</b>        | 1.1E+07                      | 1         | <b>17.31</b>        | 1.31E+07                     |
| 2         | <b>20.54</b>        | 1.4E+06                      | 2         | <b>19.08</b>        | 3.87E+06                     |
| 3         | 20.38               | 1.6E+06                      | 3         | <b>19.62</b>        | 2.67E+06                     |
| 4         | <b>20.98</b>        | 1.0E+06                      | 4         | <b>20.61</b>        | 1.35E+06                     |
| 5         | <b>20.28</b>        | 1.7E+06                      | 5         | <b>20.60</b>        | 1.36E+06                     |
| 6         | <b>20.20</b>        | 1.8E+06                      | 6         | 21.21               | 8.96E+05                     |
| 7         | <b>21.71</b>        | 6.4E+05                      | 7         | 22.15               | 4.70E+05                     |
| 8         | 21.95               | 5.4E+05                      | 8         | 22.32               | 4.18E+05                     |

|    |              |         |    |       |          |
|----|--------------|---------|----|-------|----------|
| 9  | 22.14        | 4.7E+05 | 9  | 23.13 | 2.39E+05 |
| 10 | 22.88        | 2.8E+05 | 10 | 23.21 | 2.27E+05 |
| 11 | 22.34        | 4.1E+05 | 11 | 23.13 | 2.27E+05 |
| 12 | <b>21.82</b> | 5.9E+05 | 12 | 22.12 | 4.79E+05 |
| 13 | 23.32        | 2.1E+05 | 13 | 25.29 | 5.42E+04 |
| 14 | 24.28        | 1.1E+05 | 14 | 24.97 | 6.76E+04 |
| 15 | <b>24.14</b> | 1.2E+05 | 15 | 24.38 | 1.01E+05 |
| 16 | 22.55        | 3.6E+05 | 16 | 22.88 | 2.84E+05 |
| 17 | 24.00        | 1.3E+05 | 17 | 24.81 | 7.54E+04 |
| 18 | 25.30        | 5.4E+04 | 18 | 28.33 | 6.71E+03 |
| 19 | 25.50        | 4.7E+04 | 19 | 25.45 | 2.39E+05 |
| 20 | 26.27        | 2.8E+04 | 20 | 29.46 | 2.27E+05 |
| 21 | 25.54        | 4.6E+04 | 21 | 25.95 | 2.27E+05 |
| 22 | 25.87        | 3.7E+04 | 22 | 27.42 | 4.79E+05 |
| 23 | <b>24.04</b> | 1.3E+05 | 23 | 24.45 | 5.42E+04 |
| 24 | 25.24        | 5.6E+04 | 24 | 25.20 | 6.76E+04 |
| 25 | 29.70        | 2.6E+03 | 25 | 25.07 | 1.01E+05 |
| 26 | 25.47        | 4.8E+04 | 26 | 26.32 | 2.84E+05 |
| 27 | 25.14        | 6.0E+04 | 27 | 26.12 | 7.54E+04 |
| 28 | 27.14        | 1.5E+04 | 28 | 27.41 | 6.71E+03 |
| 29 | 27.15        | 1.5E+04 | 29 | 27.34 | 1.33E+04 |
| 30 | 28.86        | 4.7E+03 | 30 | 27.24 | 1.42E+04 |
| 31 | 25.27        | 5.5E+04 | 31 | 26.24 | 1.42E+04 |
| 32 | 26.44        | 2.5E+04 | 32 | 26.64 | 2.14E+04 |

|    |       |         |    |       |          |
|----|-------|---------|----|-------|----------|
| 33 | 28.96 | 4.4E+03 | 33 | 28.92 | 4.47E+03 |
| 34 | 27.89 | 9.1E+03 | 34 | 27.82 | 9.53E+03 |
| 35 | 27.04 | 1.6E+04 | 35 | 26.66 | 2.12E+04 |
| 36 | 28.13 | 7.7E+03 | 36 | 27.05 | 1.62E+04 |
| 37 | 30.54 | 1.5E+03 | 37 | 30.13 | 1.95E+03 |
| 38 | 28.14 | 7.6E+03 | 38 | 29.36 | 3.31E+03 |
| 39 | 29.76 | 2.5E+03 | 39 | 30.12 | 1.96E+03 |
| 40 | 27.65 | 1.1E+04 | 40 | 28.19 | 7.39E+03 |
| 41 | 30.13 | 1.9E+03 | 41 | 30.14 | 7.39E+03 |
| 42 | 28.43 | 6.2E+03 | 42 | 29.48 | 3.04E+03 |
| 43 | 31.05 | 1.0E+03 | 43 | 31.61 | 7.04E+02 |
| 44 | 29.24 | 3.6E+03 | 44 | 29.51 | 2.98E+03 |
| 45 | 30.10 | 2.0E+03 | 45 | 31.19 | 9.40E+02 |
| 46 | 31.54 | 7.4E+02 | 46 | 31.34 | 8.48E+02 |
| 47 | 35.19 | 6.0E+01 | 47 | 34.55 | 9.34E+01 |
| 48 | 32.06 | 5.2E+02 | 48 | 31.19 | 9.40E+02 |
| 49 | 35.22 | 5.9E+01 | 49 | 36.04 | 3.35E+01 |
| 50 | 36.36 | 2.7E+01 | 50 | 35.83 | 3.87E+01 |

---

Quantification Cycle values (Cq values) given in bold indicate that SARS-CoV-2 could be propagated in cell culture.

Source: Puyskens et al (2021). Establishment of a specimen panel for the decentralised technical evaluation of the sensitivity of 31 rapid diagnostic tests for SARS-CoV-2 antigen, Germany, September 2020 to April 2021. Eurosurveillance

**Figure 1**  
**Comparative evaluation results of SARS-CoV-2 antigen RDT passing the sensitivity criteria**

|                     |           | 1                                     | 2                                                           | 3                                 | 4                           | 5                                                                          | 6                            | 7                                                | 8                                            | 9                                                       | 10                         | 11                                          | 12                                   | 13                                                    | 14                                                                              | 15                                                   | 16                                     | 17                                                                |
|---------------------|-----------|---------------------------------------|-------------------------------------------------------------|-----------------------------------|-----------------------------|----------------------------------------------------------------------------|------------------------------|--------------------------------------------------|----------------------------------------------|---------------------------------------------------------|----------------------------|---------------------------------------------|--------------------------------------|-------------------------------------------------------|---------------------------------------------------------------------------------|------------------------------------------------------|----------------------------------------|-------------------------------------------------------------------|
| <b>Manufacturer</b> |           | Abbott Rapid Diagnostics Jena GmbH    | ACON Biotech (Hangzhou) Co., Ltd                            | Aesku Diagnostics GmbH            | Affimedix                   | Amazing Biotech (Shanghai) Co., Ltd                                        | Ameda Labordiagnostik GmbH   | AmonMed (Xiamen) Biotechnology Co.,Ltd.          | Anbio (Xiamen) Biotechnology Co., Ltd        | Anhui Deepblue Medical Technology Co., Ltd.             | ASAN PHARM.CO.,LTD.        | Atlas Link Technology Co.,Ltd.              | Avalun                               | AXIOM Gesellschaft für Diagnostica und Biochemica mbH | Azure Biotech Inc.                                                              | Becton Dickinson                                     | Beijing Beier Bioengineering Co., Ltd. | Beijing Hotgen Biotech Co., Ltd.                                  |
| <b>Test name</b>    |           | Panbio™ Covid-19 Ag Rapid Test Device | Flowflex SARS-CoV-2-Antigenschnelltest (Nasopharynxstuffer) | Aesku Rapid SARS-CoV-2 Rapid Test | TestNOW® - COVID-19 Antigen | CoroVisio Covid-19 Ag Versieglungsrollchen Teststreifen (Kolloidales Gold) | AMP Rapid Test SARS-CoV-2 Ag | COVID-19 Antigen Rapid Test Kit (Colloidal Gold) | Rapid Covid-19 Antigen Test (Colloidal Gold) | COVID-19 (SARS-CoV-2) Antigen Test Kit (Colloidal Gold) | Asan Easy Test COVID-19 Ag | Nova Test SARS-CoV-2 Antigen Rapid Test Kit | Ksmart® SARS-CoV2 Antigen Rapid Test | Axiom Diagnostics COVID-19 Ag Schnelltest             | Dia Sure Covid-19 Antigen Rapid Test Device (Nasopharyngeal/Oropharyngeal Swab) | BD Veritor™ System for Rapid Detection of SARS-CoV-2 | Covid-19 Antigen Schnelltest           | Neuartiges Coronavirus (2019-nCoV)-Antigentest (Kolloidales Gold) |
| <b>Panel 1 V1</b>   |           | <b>Panel 1 V2</b>                     |                                                             | Panel 1 V1                        | Panel 1 V2                  | Panel 1 V2                                                                 | Panel 1 V1                   | Panel 1 V2                                       | Panel 1 V2                                   | Panel 1 V2                                              | Panel 1 V2                 | Panel 1 V2                                  | Panel 1 V2                           | Panel 1 V2                                            | Panel 1 V2                                                                      | Panel 1 V1                                           | Panel 1 V1                             | Panel 1 V2                                                        |
| <b>Pool Nr.</b>     | <b>Cq</b> | <b>Pool Nr.</b>                       | <b>Cq</b>                                                   |                                   |                             |                                                                            |                              |                                                  |                                              |                                                         |                            |                                             |                                      |                                                       |                                                                                 |                                                      |                                        |                                                                   |
| 1                   | 17,55     | 1                                     | 17,31                                                       | 1                                 | 1                           | 1                                                                          | 1                            | 1                                                | 1                                            | 1                                                       | 1                          | 1                                           | 1                                    | 1                                                     | 1                                                                               | 1                                                    | 1                                      | 1                                                                 |
| 6                   | 20,20     | 2                                     | 19,08                                                       | 1                                 | 1                           | 1                                                                          | 1                            | 1                                                | 1                                            | 1                                                       | 1                          | 1                                           | 1                                    | 1                                                     | 1                                                                               | 1                                                    | 1                                      | 1                                                                 |
| 5                   | 20,28     | 3                                     | 19,62                                                       | 1                                 | 1                           | 1                                                                          | 1                            | 1                                                | 1                                            | 1                                                       | 1                          | 1                                           | 1                                    | 1                                                     | 1                                                                               | 1                                                    | 1                                      | 1                                                                 |
| 3                   | 20,38     | 5                                     | 20,60                                                       | 1                                 | 1                           | 1                                                                          | 1                            | 1                                                | 1                                            | 1                                                       | 1                          | 1                                           | 1                                    | 1                                                     | 1                                                                               | 1                                                    | 1                                      | 1                                                                 |
| 2                   | 20,54     | 4                                     | 20,61                                                       | 1                                 | 1                           | 1                                                                          | 1                            | 1                                                | 1                                            | 1                                                       | 1                          | 1                                           | 1                                    | 1                                                     | 1                                                                               | 1                                                    | 1                                      | 1                                                                 |
| 4                   | 20,98     | 6                                     | 21,21                                                       | 1                                 | 1                           | 1                                                                          | 1                            | 1                                                | 1                                            | 1                                                       | 1                          | 1                                           | 1                                    | 1                                                     | 1                                                                               | 1                                                    | 1                                      | 1                                                                 |
| 7                   | 21,71     | 12                                    | 22,12                                                       | 1                                 | 1                           | 1                                                                          | 0                            | 1                                                | 1                                            | 1                                                       | 1                          | 1                                           | 1                                    | 1                                                     | 1                                                                               | 1                                                    | 1                                      | 1                                                                 |
| 12                  | 21,82     | 7                                     | 22,15                                                       | 1                                 | 1                           | 1                                                                          | 1                            | 1                                                | 1                                            | 1                                                       | 1                          | 1                                           | 1                                    | 1                                                     | 1                                                                               | 1                                                    | 1                                      | 1                                                                 |
| 8                   | 21,95     | 8                                     | 22,32                                                       | 1                                 | 1                           | 1                                                                          | 1                            | 0                                                | 1                                            | 1                                                       | 1                          | 1                                           | 1                                    | 1                                                     | 1                                                                               | 1                                                    | 1                                      | 1                                                                 |
| 9                   | 22,14     | 16                                    | 22,88                                                       | 1                                 | 1                           | 1                                                                          | 1                            | 1                                                | 1                                            | 1                                                       | 1                          | 1                                           | 1                                    | 1                                                     | 1                                                                               | 1                                                    | 1                                      | 1                                                                 |
| 11                  | 22,34     | 9                                     | 23,13                                                       | 1                                 | 1                           | 1                                                                          | 1                            | 1                                                | 1                                            | 1                                                       | 1                          | 1                                           | 1                                    | 1                                                     | 1                                                                               | 0                                                    | 1                                      | 1                                                                 |
| 16                  | 22,55     | 11                                    | 23,13                                                       | 1                                 | 1                           | 0                                                                          | 1                            | 1                                                | 1                                            | 1                                                       | 1                          | 1                                           | 0                                    | 1                                                     | 1                                                                               | 1                                                    | 1                                      | 1                                                                 |
| 10                  | 22,88     | 10                                    | 23,21                                                       | 1                                 | 1                           | 1                                                                          | 1                            | 1                                                | 1                                            | 1                                                       | 1                          | 1                                           | 1                                    | 1                                                     | 1                                                                               | 0                                                    | 1                                      | 1                                                                 |
| 13                  | 23,32     | 15                                    | 24,38                                                       | 1                                 | 1                           | 0                                                                          | 1                            | 0                                                | 1                                            | 1                                                       | 1                          | 1                                           | 1                                    | 1                                                     | 1                                                                               | 1                                                    | 1                                      | 1                                                                 |
| 17                  | 24,00     | 23                                    | 24,45                                                       | 1                                 | 1                           | 0                                                                          | 1                            | 0                                                | 1                                            | 1                                                       | 1                          | 1                                           | 1                                    | 1                                                     | 0                                                                               | 1                                                    | 1                                      | 1                                                                 |
| 23                  | 24,04     | 17                                    | 24,81                                                       | 1                                 | 0                           | 1                                                                          | 1                            | 1                                                | 1                                            | 1                                                       | 1                          | 1                                           | 1                                    | 1                                                     | 0                                                                               | 0                                                    | 0                                      | 1                                                                 |
| 15                  | 24,14     | 14                                    | 24,97                                                       | 1                                 | 1                           | 1                                                                          | 1                            | 1                                                | 1                                            | 1                                                       | 1                          | 1                                           | 1                                    | 1                                                     | 0                                                                               | 0                                                    | 0                                      | 1                                                                 |
| 14                  | 24,28     | 25                                    | 25,07                                                       | 1                                 | 0                           | 0                                                                          | 1                            | 0                                                | 1                                            | 1                                                       | 1                          | 1                                           | 1                                    | 1                                                     | 0                                                                               | 1                                                    | 0                                      | 1                                                                 |
| 27                  | 25,14     | 24                                    | 25,20                                                       | 1                                 | 0                           | 0                                                                          | 1                            | 1                                                | 1                                            | 1                                                       | 1                          | 1                                           | 1                                    | 0                                                     | 1                                                                               | 0                                                    | 0                                      | 1                                                                 |
| 24                  | 25,24     | 13                                    | 25,29                                                       | 1                                 | 1                           | 1                                                                          | 1                            | 1                                                | 1                                            | 1                                                       | 1                          | 1                                           | 1                                    | 1                                                     | 1                                                                               | 0                                                    | 0                                      | 1                                                                 |
| 31                  | 25,27     | 19                                    | 25,45                                                       | 0                                 | 0                           | 1                                                                          | 0                            | 1                                                | 1                                            | 1                                                       | 1                          | 1                                           | 0                                    | 1                                                     | 0                                                                               | 0                                                    | 0                                      | 1                                                                 |
| 18                  | 25,30     | 21                                    | 25,95                                                       | 1                                 | 0                           | 0                                                                          | 1                            | 0                                                | 1                                            | 1                                                       | 0                          | 1                                           | 1                                    | 0                                                     | 0                                                                               | 1                                                    | 0                                      | 1                                                                 |
| 26                  | 25,47     | 27                                    | 26,12                                                       | 1                                 | 0                           | 0                                                                          | 1                            | 0                                                | 1                                            | 1                                                       | 1                          | 1                                           | 0                                    | 1                                                     | 0                                                                               | 1                                                    | 0                                      | 1                                                                 |
| 19                  | 25,50     | 31                                    | 26,24                                                       | 1                                 | 0                           | 0                                                                          | 1                            | 0                                                | 1                                            | 1                                                       | 0                          | 1                                           | 0                                    | 0                                                     | 0                                                                               | 0                                                    | 0                                      | 0                                                                 |
| 21                  | 25,54     | 26                                    | 26,32                                                       | 1                                 | 0                           | 0                                                                          | 1                            | 0                                                | 1                                            | 0                                                       | 0                          | 1                                           | 0                                    | 0                                                     | 0                                                                               | 0                                                    | 0                                      | 0                                                                 |
| 22                  | 25,87     | 32                                    | 26,64                                                       | 1                                 | 0                           | 0                                                                          | 1                            | 0                                                | 1                                            | 0                                                       | 0                          | 0                                           | 0                                    | 0                                                     | 0                                                                               | 0                                                    | 0                                      | 0                                                                 |
| 20                  | 26,27     | 35                                    | 26,66                                                       | 1                                 | 0                           | 0                                                                          | 1                            | 0                                                | 1                                            | 1                                                       | 0                          | 1                                           | 1                                    | 0                                                     | 1                                                                               | 0                                                    | 0                                      | 1                                                                 |
| 32                  | 26,44     | 36                                    | 27,05                                                       | 0                                 | 0                           | 0                                                                          | 0                            | 0                                                | 1                                            | 1                                                       | 1                          | 1                                           | 1                                    | 0                                                     | 1                                                                               | 0                                                    | 0                                      | 0                                                                 |
| 35                  | 27,04     | 30                                    | 27,24                                                       | 1                                 | 0                           | 0                                                                          | 1                            | 0                                                | 1                                            | 1                                                       | 0                          | 1                                           | 0                                    | 0                                                     | 1                                                                               | 0                                                    | 0                                      | 1                                                                 |
| 28                  | 27,14     | 29                                    | 27,34                                                       | 0                                 | 0                           | 0                                                                          | 0                            | 0                                                | 1                                            | 1                                                       | 0                          | 1                                           | 1                                    | 0                                                     | 1                                                                               | 0                                                    | 0                                      | 0                                                                 |
| 29                  | 27,15     | 28                                    | 27,41                                                       | 1                                 | 0                           | 0                                                                          | 0                            | 1                                                | 1                                            | 0                                                       | 0                          | 0                                           | 0                                    | 1                                                     | 0                                                                               | 0                                                    | 0                                      | 0                                                                 |
| 40                  | 27,65     | 22                                    | 27,42                                                       | 0                                 | 0                           | 1                                                                          | 0                            | 0                                                | 1                                            | 1                                                       | 1                          | 1                                           | 1                                    | 1                                                     | 0                                                                               | 0                                                    | 0                                      | 1                                                                 |
| 34                  | 27,89     | 34                                    | 27,82                                                       | 1                                 | 0                           | 0                                                                          | 0                            | 0                                                | 0                                            | 0                                                       | 0                          | 0                                           | 0                                    | 0                                                     | 0                                                                               | 0                                                    | 0                                      | 0                                                                 |
| 36                  | 28,13     | 40                                    | 28,19                                                       | 1                                 | 0                           | 0                                                                          | 1                            | 0                                                | 0                                            | 0                                                       | 0                          | 0                                           | 0                                    | 0                                                     | 0                                                                               | 0                                                    | 0                                      | 0                                                                 |
| 38                  | 28,14     | 18                                    | 28,33                                                       | 1                                 | 0                           | 1                                                                          | 0                            | 1                                                | 1                                            | 1                                                       | 1                          | 1                                           | 1                                    | 1                                                     | 0                                                                               | 0                                                    | 0                                      | 1                                                                 |
| 42                  | 28,43     | 33                                    | 28,92                                                       | 0                                 | 0                           | 0                                                                          | 0                            | 0                                                | 1                                            | 0                                                       | 0                          | 0                                           | 0                                    | 0                                                     | 0                                                                               | 0                                                    | 0                                      | 0                                                                 |
| 30                  | 28,86     | 38                                    | 29,36                                                       | 1                                 | 0                           | 0                                                                          | 0                            | 1                                                | 1                                            | 0                                                       | 0                          | 1                                           | 1                                    | 0                                                     | 0                                                                               | 0                                                    | 0                                      | 0                                                                 |
| 33                  | 28,96     | 20                                    | 29,46                                                       | 0                                 | 0                           | 0                                                                          | 0                            | 1                                                | 1                                            | 1                                                       | 1                          | 1                                           | 1                                    | 1                                                     | 0                                                                               | 0                                                    | 0                                      | 1                                                                 |
| 44                  | 29,24     | 42                                    | 29,48                                                       | 0                                 | 0                           | 0                                                                          | 0                            | 0                                                | 1                                            | 0                                                       | 0                          | 0                                           | 0                                    | 0                                                     | 0                                                                               | 0                                                    | 0                                      | 0                                                                 |
| 25                  | 29,70     | 44                                    | 29,51                                                       | 0                                 | 0                           | 0                                                                          | 1                            | 0                                                | 0                                            | 0                                                       | 0                          | 0                                           | 0                                    | 0                                                     | 0                                                                               | 0                                                    | 0                                      | 0                                                                 |
| 39                  | 29,76     | 39                                    | 30,12                                                       | 0                                 | 0                           | 0                                                                          | 0                            | 0                                                | 1                                            | 0                                                       | 0                          | 0                                           | 0                                    | 0                                                     | 0                                                                               | 0                                                    | 0                                      | 0                                                                 |
| 45                  | 30,10     | 37                                    | 30,13                                                       | 0                                 | 0                           | 0                                                                          | 0                            | 0                                                | 1                                            | 0                                                       | 0                          | 0                                           | 0                                    | 0                                                     | 0                                                                               | 0                                                    | 0                                      | 0                                                                 |
| 41                  | 30,13     | 41                                    | 30,14                                                       | 0                                 | 0                           | 0                                                                          | 0                            | 0                                                | 0                                            | 0                                                       | 0                          | 0                                           | 0                                    | 0                                                     | 0                                                                               | 0                                                    | 0                                      | 0                                                                 |
| 37                  | 30,54     | 45                                    | 31,19                                                       | 0                                 | 0                           | 0                                                                          | 0                            | 0                                                | 0                                            | 0                                                       | 0                          | 0                                           | 0                                    | 0                                                     | 0                                                                               | 0                                                    | 0                                      | 0                                                                 |
| 43                  | 31,05     | 48                                    | 31,19                                                       | 0                                 | 0                           | 0                                                                          | 0                            | 0                                                | 0                                            | 0                                                       | 0                          | 0                                           | 0                                    | 0                                                     | 0                                                                               | 0                                                    | 0                                      | 0                                                                 |
| 46                  | 31,54     | 46                                    | 31,34                                                       | 0                                 | 0                           | 0                                                                          | 0                            | 0                                                | 1                                            | 0                                                       | 0                          | 0                                           | 0                                    | 0                                                     | 1                                                                               | 0                                                    | 0                                      | 0                                                                 |
| 48                  | 32,06     | 43                                    | 31,61                                                       | 0                                 | 0                           | 0                                                                          | 0                            | 0                                                | 0                                            | 0                                                       | 0                          | 0                                           | 0                                    | 1                                                     | 0                                                                               | 0                                                    | 0                                      | 0                                                                 |
| 47                  | 35,19     | 47                                    | 34,55                                                       | 0                                 | 0                           | 0                                                                          | 0                            | 0                                                | 0                                            | 0                                                       | 0                          | 0                                           | 0                                    | 0                                                     | 0                                                                               | 0                                                    | 0                                      | 0                                                                 |
| 49                  | 35,22     | 50                                    | 35,83                                                       | 0                                 | 0                           | 0                                                                          | 0                            | 0                                                | 0                                            | 0                                                       | 0                          | 0                                           | 0                                    | 0                                                     | 0                                                                               | 0                                                    | 0                                      | 0                                                                 |
| 50                  | 36,36     | 49                                    | 36,04                                                       | 0                                 | 0                           | 0                                                                          | 0                            | 0                                                | 0                                            | 0                                                       | 0                          | 0                                           | 0                                    | 0                                                     | 0                                                                               | 0                                                    | 0                                      | 0                                                                 |

|              | 18                                       | 19                                        | 20                                                     | 21                         | 22                           | 23                       | 24                                        | 25                                                                               | 26                                 | 27                             | 28                                                                    | 29                           | 30                                     | 31                                                  | 32                                        | 33                                                    | 34                                                   |
|--------------|------------------------------------------|-------------------------------------------|--------------------------------------------------------|----------------------------|------------------------------|--------------------------|-------------------------------------------|----------------------------------------------------------------------------------|------------------------------------|--------------------------------|-----------------------------------------------------------------------|------------------------------|----------------------------------------|-----------------------------------------------------|-------------------------------------------|-------------------------------------------------------|------------------------------------------------------|
| Manufacturer | Beijing Lepu Medical Technology Co., Ltd | Beijing Tigsun Diagnostics Co.,Ltd.       | BIOMERICA Inc.                                         | BIONOTE                    | BioRepair GmbH               | BIOSYNEX SWISS SA        | BTNX, Inc. (Biotrend Chemikalien GmbH)    | Chil Tibbi Mal. San. Tic. Ltd. Şti                                               | Core Technology Co., Ltd.          | DNA Diagnostic A/S.            | Edinburgh Genetics Limited                                            | Eurobio Scientific           | Fujirebio Inc. (Mast Diagnostica GmbH) | Genrui Biotech Inc.                                 | GenSure Biotech Inc.                      | Getein Biotech, Inc.                                  | Green Cross Medical Science Corp. (Weko Pharma GmbH) |
| Test name    | SARS-CoV-2 Antigen Rapid Test Kit        | Tigsun COVID-19 Saliva Antigen Rapid Test | COVID-19-Antigen-Schnelltest (Nasopharyngeal-Abstrich) | NowCheck® COVID-19 Ag Test | Covid 19 Antigen Schnelltest | BIOSYNEX COVID-19 Ag BSS | Rapid Response COVID-19 Rapid Test Device | COVID-19 Antigen Schnell Test (Nasopharyngeal / Oropharyngeal Tupfer - Kassette) | Canea COVID-19 Antigen Schnelltest | Covid-19 Antigen Detection Kit | Edinburgh Genetics ActivXpress+ COVID-19 Antigen Complete Testing Kit | EBS SARS-CoV-2 Ag Rapid Test | ESPLINE® SARS-CoV-2                    | Genrui SARS-CoV-2 Antigen Test Kit (Colloidal Gold) | GensureTM COVID-19 Antigen Rapid Test Kit | One Step Test for SARS-CoV-2 Antigen (Colloidal Gold) | Genedia W Covid-19 Ag                                |

| Panel 1 V1 |       | Panel 1 V2 |       | Panel 1 V2 | Panel 1 V2 | Panel 1 V2 | Panel 1 V1 | Panel 1 V2 | Panel 1 V1 | Panel 1 V2 | Panel 1 V2 | Panel 1 V2 | Panel 1 V2 | Panel 1 V1 | Panel 1 V2 | Panel 1 V2 | Panel 1 V2 | Panel 1 V1 |   |
|------------|-------|------------|-------|------------|------------|------------|------------|------------|------------|------------|------------|------------|------------|------------|------------|------------|------------|------------|---|
| Pool Nr.   | Cq    | Pool Nr.   | Cq    |            |            |            |            |            |            |            |            |            |            |            |            |            |            |            |   |
| 1          | 17,55 | 1          | 17,31 | 1          | 1          | 1          | 1          | 1          | 1          | 1          | 1          | 1          | 1          | 1          | 1          | 1          | 1          | 1          | 1 |
| 6          | 20,20 | 2          | 19,08 | 1          | 1          | 1          | 1          | 1          | 1          | 1          | 1          | 1          | 1          | 1          | 1          | 1          | 1          | 1          | 1 |
| 5          | 20,28 | 3          | 19,62 | 1          | 1          | 1          | 1          | 1          | 1          | 1          | 1          | 1          | 1          | 1          | 1          | 1          | 1          | 1          | 1 |
| 3          | 20,38 | 5          | 20,60 | 1          | 1          | 1          | 1          | 1          | 1          | 1          | 1          | 1          | 1          | 1          | 1          | 1          | 1          | 1          | 1 |
| 2          | 20,54 | 4          | 20,61 | 1          | 1          | 1          | 1          | 1          | 1          | 1          | 1          | 1          | 1          | 1          | 1          | 1          | 1          | 1          | 1 |
| 4          | 20,98 | 6          | 21,21 | 1          | 1          | 1          | 1          | 1          | 1          | 1          | 1          | 1          | 1          | 1          | 1          | 1          | 1          | 1          | 1 |
| 7          | 21,71 | 12         | 22,12 | 1          | 1          | 1          | 1          | 1          | 1          | 1          | 1          | 1          | 1          | 1          | 1          | 1          | 1          | 1          | 1 |
| 12         | 21,82 | 7          | 22,15 | 1          | 1          | 1          | 1          | 1          | 1          | 1          | 1          | 1          | 1          | 1          | 1          | 1          | 1          | 1          | 1 |
| 8          | 21,95 | 8          | 22,32 | 1          | 1          | 1          | 1          | 1          | 1          | 1          | 1          | 1          | 1          | 1          | 1          | 1          | 1          | 1          | 1 |
| 9          | 22,14 | 16         | 22,88 | 1          | 1          | 1          | 1          | 1          | 1          | 1          | 1          | 1          | 1          | 1          | 1          | 1          | 1          | 1          | 1 |
| 11         | 22,34 | 9          | 23,13 | 1          | 1          | 1          | 1          | 1          | 1          | 1          | 1          | 1          | 1          | 1          | 1          | 1          | 1          | 1          | 1 |
| 16         | 22,55 | 11         | 23,13 | 1          | 1          | 1          | 1          | 1          | 1          | 1          | 1          | 1          | 1          | 1          | 1          | 1          | 1          | 1          | 1 |
| 10         | 22,88 | 10         | 23,21 | 1          | 1          | 1          | 1          | 1          | 1          | 1          | 1          | 1          | 1          | 1          | 1          | 1          | 1          | 1          | 1 |
| 13         | 23,32 | 15         | 24,38 | 1          | 1          | 1          | 1          | 1          | 0          | 1          | 0          | 1          | 1          | 1          | 1          | 1          | 1          | 1          | 1 |
| 17         | 24,00 | 23         | 24,45 | 1          | 1          | 1          | 1          | 1          | 1          | 0          | 1          | 1          | 0          | 1          | 0          | 0          | 1          | 1          | 1 |
| 23         | 24,04 | 17         | 24,81 | 1          | 1          | 1          | 1          | 1          | 1          | 1          | 1          | 1          | 1          | 1          | 1          | 1          | 1          | 1          | 0 |
| 15         | 24,14 | 14         | 24,97 | 1          | 1          | 1          | 1          | 1          | 1          | 1          | 1          | 1          | 1          | 1          | 1          | 1          | 1          | 1          | 0 |
| 14         | 24,28 | 25         | 25,07 | 1          | 1          | 1          | 1          | 0          | 1          | 1          | 1          | 1          | 1          | 1          | 1          | 1          | 1          | 1          | 0 |
| 27         | 25,14 | 24         | 25,20 | 0          | 1          | 1          | 1          | 0          | 1          | 0          | 1          | 1          | 0          | 1          | 1          | 0          | 1          | 1          | 0 |
| 24         | 25,24 | 13         | 25,29 | 1          | 1          | 1          | 1          | 1          | 1          | 1          | 1          | 1          | 1          | 0          | 1          | 1          | 1          | 1          | 0 |
| 31         | 25,27 | 19         | 25,45 | 1          | 1          | 1          | 1          | 0          | 1          | 1          | 1          | 1          | 1          | 0          | 1          | 0          | 1          | 1          | 0 |
| 18         | 25,30 | 21         | 25,95 | 0          | 1          | 0          | 1          | 1          | 1          | 0          | 1          | 0          | 1          | 0          | 1          | 0          | 1          | 1          | 1 |
| 26         | 25,47 | 27         | 26,12 | 0          | 1          | 0          | 1          | 1          | 0          | 1          | 1          | 1          | 1          | 1          | 0          | 1          | 1          | 1          | 1 |
| 19         | 25,50 | 31         | 26,24 | 0          | 1          | 0          | 1          | 1          | 0          | 0          | 0          | 0          | 0          | 1          | 0          | 0          | 1          | 0          | 0 |
| 21         | 25,54 | 26         | 26,32 | 0          | 1          | 1          | 1          | 1          | 0          | 1          | 0          | 0          | 0          | 0          | 0          | 0          | 1          | 0          | 0 |
| 22         | 25,87 | 32         | 26,64 | 0          | 1          | 0          | 1          | 1          | 1          | 0          | 0          | 0          | 1          | 0          | 1          | 0          | 1          | 0          | 0 |
| 20         | 26,27 | 35         | 26,66 | 0          | 1          | 0          | 1          | 1          | 0          | 0          | 0          | 0          | 0          | 0          | 1          | 0          | 1          | 0          | 0 |
| 32         | 26,44 | 36         | 27,05 | 0          | 1          | 0          | 0          | 1          | 1          | 1          | 0          | 0          | 0          | 0          | 0          | 0          | 1          | 0          | 0 |
| 35         | 27,04 | 30         | 27,24 | 0          | 1          | 0          | 1          | 1          | 0          | 1          | 0          | 0          | 0          | 0          | 1          | 0          | 0          | 1          | 0 |
| 28         | 27,14 | 29         | 27,34 | 1          | 1          | 0          | 0          | 1          | 0          | 1          | 0          | 0          | 0          | 0          | 0          | 1          | 0          | 1          | 0 |
| 29         | 27,15 | 28         | 27,41 | 0          | 1          | 0          | 1          | 1          | 0          | 0          | 0          | 0          | 0          | 0          | 0          | 0          | 0          | 1          | 0 |
| 40         | 27,65 | 22         | 27,42 | 1          | 1          | 0          | 0          | 1          | 0          | 1          | 1          | 1          | 1          | 0          | 1          | 0          | 1          | 1          | 0 |
| 34         | 27,89 | 34         | 27,82 | 0          | 1          | 0          | 1          | 0          | 0          | 0          | 0          | 0          | 0          | 0          | 1          | 0          | 1          | 0          | 0 |
| 36         | 28,13 | 40         | 28,19 | 0          | 0          | 0          | 1          | 0          | 1          | 0          | 0          | 0          | 0          | 0          | 0          | 0          | 0          | 0          | 0 |
| 38         | 28,14 | 18         | 28,33 | 1          | 1          | 1          | 1          | 1          | 0          | 1          | 1          | 1          | 1          | 1          | 0          | 1          | 1          | 1          | 0 |
| 42         | 28,43 | 33         | 28,92 | 0          | 1          | 0          | 0          | 0          | 0          | 0          | 0          | 0          | 0          | 0          | N/A        | 0          | 0          | 0          | 0 |
| 30         | 28,86 | 38         | 29,36 | 0          | 1          | 0          | 1          | 1          | 0          | 0          | 0          | 0          | 0          | 0          | 0          | 0          | 0          | 1          | 0 |
| 33         | 28,96 | 20         | 29,46 | 0          | 1          | 1          | 0          | 1          | 0          | 1          | 1          | 1          | 1          | 1          | 1          | 0          | 1          | 1          | 0 |
| 44         | 29,24 | 42         | 29,48 | 0          | 0          | 0          | 0          | 0          | 0          | 0          | 0          | 0          | 0          | 0          | 0          | 0          | 0          | 0          | 0 |
| 25         | 29,70 | 44         | 29,51 | 0          | 0          | 0          | 0          | 1          | 0          | 0          | 0          | 0          | 0          | 0          | 0          | 0          | 0          | 0          | 0 |
| 39         | 29,76 | 39         | 30,12 | 0          | 0          | 0          | 1          | 0          | 0          | 0          | 0          | 0          | 0          | 0          | 0          | 0          | 0          | 0          | 0 |
| 45         | 30,10 | 37         | 30,13 | 0          | 1          | 0          | 0          | 0          | 0          | 0          | 0          | 0          | 0          | 0          | 0          | 0          | 0          | 0          | 0 |
| 41         | 30,13 | 41         | 30,14 | 0          | 0          | 0          | 0          | 1          | 0          | 0          | 0          | 0          | 0          | 0          | 0          | 0          | 0          | 0          | 0 |
| 37         | 30,54 | 45         | 31,19 | 0          | 0          | 0          | 0          | 0          | 0          | 0          | 0          | 0          | 0          | 0          | 0          | 0          | 0          | 0          | 0 |
| 43         | 31,05 | 48         | 31,19 | 0          | 1          | 0          | 0          | 0          | 0          | 0          | 0          | 0          | 0          | 0          | 0          | 0          | 0          | 0          | 0 |
| 46         | 31,54 | 46         | 31,34 | 0          | 1          | 0          | 0          | 0          | 0          | 1          | 0          | 0          | 0          | 0          | 0          | 0          | 0          | 0          | 0 |
| 48         | 32,06 | 43         | 31,61 | invalid    | 0          | 0          | 0          | 0          | 0          | 0          | 0          | 0          | 0          | 0          | 0          | 0          | 0          | 0          | 0 |
| 47         | 35,19 | 47         | 34,55 | 0          | 0          | 0          | 0          | 0          | 0          | 0          | 0          | 0          | 0          | 0          | 0          | 0          | 0          | 0          | 0 |
| 49         | 35,22 | 50         | 35,83 | 0          | 0          | 0          | 0          | 0          | 0          | 0          | 0          | 0          | 0          | 0          | 0          | 0          | 0          | 0          | 0 |
| 50         | 36,36 | 49         | 36,04 | 0          | 0          | 0          | 0          | 0          | 0          | 0          | 0          | 0          | 0          | 0          | 0          | 0          | 0          | 0          | 0 |

|              |       | 35                                                 | 36                                 | 37                                                   | 38                                   | 39                                                     | 40                                                                   | 41                                                        | 42                                                         | 43                | 44                    | 45                                                    | 46                                           | 47                                                                 | 48                                                                   | 49                                                            | 50                                      | 51                          |
|--------------|-------|----------------------------------------------------|------------------------------------|------------------------------------------------------|--------------------------------------|--------------------------------------------------------|----------------------------------------------------------------------|-----------------------------------------------------------|------------------------------------------------------------|-------------------|-----------------------|-------------------------------------------------------|----------------------------------------------|--------------------------------------------------------------------|----------------------------------------------------------------------|---------------------------------------------------------------|-----------------------------------------|-----------------------------|
| Manufacturer |       | Guangdong Hecin Scientific, Inc.                   | Guangdong Wesail Biotech Co., Ltd. | Guangzhou Wondfo Biotech Co. Ltd                     | Hangzhou Clongene Biotech Co., Ltd.  | Hangzhou Immuno Biotech Co., Ltd.                      | Hangzhou Laihe Biotech Co., Ltd. (Lissner Qi GmbH)                   | Hangzhou Lysun Biotechnology Co., Ltd.                    | Hangzhou Testsea Biotechnology Co., Ltd                    | Humasis Co., Ltd. | IVC Pragen Healthcare | Jiangsu Diagnostics Biotechnology Co., Ltd            | Jiangsu Medomics Medical Technology Co., Ltd | Joinstar Biomedical Technology Co., Ltd (CIV care impuls Vertrieb) | Labnovation Technologies, Inc.                                       | Lumigenex (Suzhou) Co., Ltd.                                  | LumiQuick Diagnostics Inc.              | LumiraDX                    |
| Test name    |       | 2019-nCoV Antigen Test Kit (colloidal gold method) | COVID-19 Ag Test Kit               | Wondfo SARS-CoV-2 Antigen Test (Lateral Flow Method) | Clungene COVID-19 Antigen Rapid Test | IMMUNOBIO SARS-CoV-2 Antigen-Schnelltest (COVID-19 Ag) | Lyher Novel Coronavirus (COVID-19) Antigen Test Kit (Colloidal Gold) | Lysun COVID-19 Antigen Rapid Test Device (Colloidal Gold) | Testsealabs® Rapid Test Kit COVID-19 Antigen Test Cassette | COVID-19 Ag Test  | GenBody COVID-19 Ag   | COVID-19 Antigen Rapid Test Cassette (Colloidal Gold) | SARS-CoV-2-Antigen-Testkit (LFIA)            | COVID-19 Antigen Schnelltest (Colloidal Gold)                      | Labnovation SARS-CoV-2 Antigen Rapid Test Kit (Immunochromatography) | PocRoc SARS-CoV-2, Antigen Schnelltest Set (Kolloidales Gold) | QuickProfile Covid-19 Antigen Test Card | LumiraDx SARS-CoV-2 Ag Test |
| Panel 1 V1   |       | Panel 1 V2                                         |                                    | Panel 1 V2                                           | Panel 1 V1                           | Panel 1 V2                                             | Panel 1 V1                                                           | Panel 1 V2                                                | Panel 1 V1                                                 | Panel 1 V2        | Panel 1 V1            | Panel 1 V2                                            | Panel 1 V1                                   | Panel 1 V2                                                         | Panel 1 V1                                                           | Panel 1 V2                                                    | Panel 1 V1                              | Panel 1 V2                  |
| Pool Nr.     | Cq    | Pool Nr.                                           | Cq                                 |                                                      |                                      |                                                        |                                                                      |                                                           |                                                            |                   |                       |                                                       |                                              |                                                                    |                                                                      |                                                               |                                         |                             |
| 1            | 17,55 | 1                                                  | 17,31                              | 1                                                    | 1                                    | 1                                                      | 1                                                                    | 1                                                         | 1                                                          | 1                 | 1                     | 1                                                     | 1                                            | 1                                                                  | 1                                                                    | 1                                                             | 1                                       | 1                           |
| 6            | 20,20 | 2                                                  | 19,08                              | 1                                                    | 1                                    | 1                                                      | 1                                                                    | 1                                                         | 1                                                          | 1                 | 1                     | 1                                                     | 1                                            | 1                                                                  | 1                                                                    | 1                                                             | 1                                       | 1                           |
| 5            | 20,28 | 3                                                  | 19,62                              | 1                                                    | 1                                    | 1                                                      | 1                                                                    | 1                                                         | 1                                                          | 1                 | 1                     | 1                                                     | 1                                            | 1                                                                  | 1                                                                    | 1                                                             | 1                                       | 1                           |
| 3            | 20,38 | 5                                                  | 20,60                              | 1                                                    | 1                                    | 1                                                      | 1                                                                    | 1                                                         | 1                                                          | 1                 | 1                     | 1                                                     | 1                                            | 1                                                                  | 1                                                                    | 1                                                             | 1                                       | 1                           |
| 2            | 20,54 | 4                                                  | 20,61                              | 1                                                    | 1                                    | 1                                                      | 1                                                                    | 1                                                         | 1                                                          | 1                 | 1                     | 1                                                     | 1                                            | 1                                                                  | 1                                                                    | 1                                                             | 1                                       | 1                           |
| 4            | 20,98 | 6                                                  | 21,21                              | 1                                                    | 1                                    | 1                                                      | 1                                                                    | 1                                                         | 1                                                          | 1                 | 1                     | 1                                                     | 1                                            | 1                                                                  | 1                                                                    | 1                                                             | 1                                       | 1                           |
| 7            | 21,71 | 12                                                 | 22,12                              | 1                                                    | 1                                    | 1                                                      | 1                                                                    | 1                                                         | 1                                                          | 1                 | 1                     | 1                                                     | 1                                            | 1                                                                  | 1                                                                    | 1                                                             | 1                                       | 1                           |
| 12           | 21,82 | 7                                                  | 22,15                              | 1                                                    | 1                                    | 1                                                      | 1                                                                    | 1                                                         | 1                                                          | 1                 | 1                     | 1                                                     | 1                                            | 1                                                                  | 1                                                                    | 1                                                             | 1                                       | 1                           |
| 8            | 21,95 | 8                                                  | 22,32                              | 1                                                    | 1                                    | 1                                                      | 1                                                                    | 1                                                         | 1                                                          | 1                 | 1                     | 1                                                     | 1                                            | 1                                                                  | 1                                                                    | 1                                                             | 1                                       | 1                           |
| 9            | 22,14 | 16                                                 | 22,88                              | 1                                                    | 1                                    | 1                                                      | 1                                                                    | 1                                                         | 1                                                          | 1                 | 1                     | 1                                                     | 1                                            | 1                                                                  | 1                                                                    | 1                                                             | 1                                       | 1                           |
| 11           | 22,34 | 9                                                  | 23,13                              | 1                                                    | 1                                    | 1                                                      | 1                                                                    | 1                                                         | 1                                                          | 1                 | 1                     | 1                                                     | 1                                            | 1                                                                  | 1                                                                    | 1                                                             | 1                                       | 1                           |
| 16           | 22,55 | 11                                                 | 23,13                              | 0                                                    | 1                                    | 1                                                      | 1                                                                    | 0                                                         | 1                                                          | 1                 | 1                     | 1                                                     | 1                                            | 1                                                                  | 1                                                                    | 1                                                             | 1                                       | 1                           |
| 10           | 22,88 | 10                                                 | 23,21                              | 1                                                    | 1                                    | 1                                                      | 1                                                                    | 1                                                         | 1                                                          | 1                 | 1                     | 1                                                     | 1                                            | 1                                                                  | 1                                                                    | 1                                                             | 1                                       | 1                           |
| 13           | 23,32 | 15                                                 | 24,38                              | 0                                                    | 1                                    | 1                                                      | 1                                                                    | 1                                                         | 1                                                          | 1                 | 1                     | 1                                                     | 1                                            | 1                                                                  | 1                                                                    | 1                                                             | 1                                       | 1                           |
| 17           | 24,00 | 23                                                 | 24,45                              | 0                                                    | 1                                    | 0                                                      | 1                                                                    | 0                                                         | 1                                                          | 1                 | 0                     | 1                                                     | 0                                            | 1                                                                  | 0                                                                    | 1                                                             | 1                                       | 1                           |
| 23           | 24,04 | 17                                                 | 24,81                              | 1                                                    | 1                                    | 1                                                      | 0                                                                    | 1                                                         | 0                                                          | 1                 | 1                     | 0                                                     | 1                                            | 1                                                                  | 1                                                                    | 1                                                             | 1                                       | 1                           |
| 15           | 24,14 | 14                                                 | 24,97                              | 1                                                    | 1                                    | 0                                                      | 1                                                                    | 1                                                         | 1                                                          | 1                 | 1                     | 1                                                     | 1                                            | 1                                                                  | 1                                                                    | 1                                                             | 1                                       | 1                           |
| 14           | 24,28 | 25                                                 | 25,07                              | 0                                                    | 1                                    | 0                                                      | 1                                                                    | 0                                                         | 1                                                          | 1                 | 1                     | 1                                                     | 0                                            | 1                                                                  | 0                                                                    | 1                                                             | 1                                       | 1                           |
| 27           | 25,14 | 24                                                 | 25,20                              | 0                                                    | 1                                    | 0                                                      | 1                                                                    | 0                                                         | 0                                                          | 1                 | 1                     | 0                                                     | 1                                            | 0                                                                  | 1                                                                    | 1                                                             | 1                                       | 1                           |
| 24           | 25,24 | 13                                                 | 25,29                              | 1                                                    | 1                                    | 0                                                      | 0                                                                    | 1                                                         | 0                                                          | 1                 | 1                     | 0                                                     | 1                                            | 1                                                                  | 1                                                                    | 1                                                             | 1                                       | 0                           |
| 31           | 25,27 | 19                                                 | 25,45                              | 0                                                    | 0                                    | 0                                                      | 0                                                                    | 1                                                         | 0                                                          | 1                 | 1                     | 0                                                     | 1                                            | 1                                                                  | 1                                                                    | 1                                                             | 1                                       | 0                           |
| 18           | 25,30 | 21                                                 | 25,95                              | 0                                                    | 1                                    | 0                                                      | 1                                                                    | 0                                                         | 1                                                          | 1                 | 1                     | 1                                                     | 0                                            | 1                                                                  | 0                                                                    | 0                                                             | 1                                       | 1                           |
| 26           | 25,47 | 27                                                 | 26,12                              | 0                                                    | 1                                    | 0                                                      | 1                                                                    | 0                                                         | 1                                                          | 1                 | 1                     | 1                                                     | 0                                            | 0                                                                  | 0                                                                    | 1                                                             | 1                                       | 1                           |
| 19           | 25,50 | 31                                                 | 26,24                              | 0                                                    | 1                                    | 0                                                      | 1                                                                    | 0                                                         | 0                                                          | 1                 | 0                     | 0                                                     | 1                                            | 0                                                                  | 1                                                                    | 1                                                             | 1                                       | 1                           |
| 21           | 25,54 | 26                                                 | 26,32                              | 0                                                    | 1                                    | 0                                                      | 0                                                                    | 0                                                         | 0                                                          | 0                 | 0                     | 0                                                     | 1                                            | 0                                                                  | 1                                                                    | 1                                                             | 0                                       | 0                           |
| 22           | 25,87 | 32                                                 | 26,64                              | 0                                                    | 1                                    | 0                                                      | 1                                                                    | 0                                                         | 1                                                          | 1                 | 0                     | 1                                                     | 0                                            | 1                                                                  | 0                                                                    | 1                                                             | 1                                       | 1                           |
| 20           | 26,27 | 35                                                 | 26,66                              | 0                                                    | 1                                    | 0                                                      | 1                                                                    | 0                                                         | 0                                                          | 1                 | 0                     | 0                                                     | 1                                            | 0                                                                  | 1                                                                    | 1                                                             | 1                                       | 1                           |
| 32           | 26,44 | 36                                                 | 27,05                              | 0                                                    | 0                                    | 0                                                      | 0                                                                    | 0                                                         | 1                                                          | 0                 | 0                     | 1                                                     | 0                                            | 1                                                                  | 0                                                                    | 1                                                             | 1                                       | 1                           |
| 35           | 27,04 | 30                                                 | 27,24                              | 0                                                    | 1                                    | 0                                                      | 0                                                                    | 0                                                         | 1                                                          | 1                 | 0                     | 1                                                     | 0                                            | 1                                                                  | 0                                                                    | 0                                                             | 1                                       | 1                           |
| 28           | 27,14 | 29                                                 | 27,34                              | 0                                                    | 0                                    | 0                                                      | 0                                                                    | 0                                                         | 1                                                          | 1                 | 0                     | 0                                                     | 1                                            | 0                                                                  | 0                                                                    | 1                                                             | 1                                       | 0                           |
| 29           | 27,15 | 28                                                 | 27,41                              | 0                                                    | 1                                    | 0                                                      | 0                                                                    | 0                                                         | 1                                                          | 0                 | 0                     | 0                                                     | 1                                            | 0                                                                  | 0                                                                    | 0                                                             | 1                                       | 1                           |
| 40           | 27,65 | 22                                                 | 27,42                              | 0                                                    | 0                                    | 0                                                      | 0                                                                    | 0                                                         | 1                                                          | 1                 | 0                     | 0                                                     | 1                                            | 0                                                                  | 1                                                                    | 1                                                             | 1                                       | 0                           |
| 34           | 27,89 | 34                                                 | 27,82                              | 0                                                    | 0                                    | 0                                                      | 0                                                                    | 0                                                         | 0                                                          | 0                 | 0                     | 0                                                     | 0                                            | 0                                                                  | 0                                                                    | 0                                                             | 1                                       | 0                           |
| 36           | 28,13 | 40                                                 | 28,19                              | 0                                                    | 1                                    | 0                                                      | 0                                                                    | 0                                                         | 0                                                          | 0                 | 0                     | 0                                                     | 0                                            | 0                                                                  | 1                                                                    | 0                                                             | 0                                       | 1                           |
| 38           | 28,14 | 18                                                 | 28,33                              | 1                                                    | 0                                    | 0                                                      | 1                                                                    | 0                                                         | 1                                                          | 1                 | 1                     | 0                                                     | 1                                            | 0                                                                  | 1                                                                    | 1                                                             | 1                                       | 0                           |
| 42           | 28,43 | 33                                                 | 28,92                              | 0                                                    | 0                                    | 0                                                      | 0                                                                    | 0                                                         | 0                                                          | 0                 | 0                     | 0                                                     | 0                                            | 0                                                                  | N/A                                                                  | 0                                                             | 0                                       | 0                           |
| 30           | 28,86 | 38                                                 | 29,36                              | 0                                                    | 1                                    | 0                                                      | 0                                                                    | 0                                                         | 1                                                          | 0                 | 0                     | 0                                                     | 1                                            | 0                                                                  | 1                                                                    | 1                                                             | 1                                       | 1                           |
| 33           | 28,96 | 20                                                 | 29,46                              | 1                                                    | 0                                    | 0                                                      | 0                                                                    | 0                                                         | 1                                                          | 1                 | 0                     | 0                                                     | 1                                            | 0                                                                  | 0                                                                    | 1                                                             | 1                                       | 0                           |
| 44           | 29,24 | 42                                                 | 29,48                              | 0                                                    | 0                                    | 0                                                      | 0                                                                    | 0                                                         | 0                                                          | 0                 | 0                     | 0                                                     | 0                                            | 0                                                                  | 0                                                                    | 0                                                             | 1                                       | 0                           |
| 25           | 29,70 | 44                                                 | 29,51                              | 0                                                    | 0                                    | 0                                                      | 1                                                                    | 0                                                         | 0                                                          | 0                 | 0                     | 0                                                     | 0                                            | 1                                                                  | 0                                                                    | 0                                                             | 1                                       | 1                           |
| 39           | 29,76 | 39                                                 | 30,12                              | 0                                                    | 0                                    | 0                                                      | 0                                                                    | 0                                                         | 0                                                          | 0                 | 0                     | 0                                                     | 0                                            | 0                                                                  | 0                                                                    | 0                                                             | 1                                       | 0                           |
| 45           | 30,10 | 37                                                 | 30,13                              | 0                                                    | 0                                    | 0                                                      | 0                                                                    | 0                                                         | 0                                                          | 0                 | 0                     | 0                                                     | 0                                            | 0                                                                  | 0                                                                    | 0                                                             | 0                                       | 0                           |
| 41           | 30,13 | 41                                                 | 30,14                              | 0                                                    | 0                                    | 0                                                      | 0                                                                    | 0                                                         | 0                                                          | 0                 | 0                     | 0                                                     | 0                                            | 0                                                                  | 0                                                                    | 0                                                             | 0                                       | 0                           |
| 37           | 30,54 | 45                                                 | 31,19                              | 0                                                    | 0                                    | 0                                                      | 0                                                                    | 0                                                         | 0                                                          | 0                 | 0                     | 0                                                     | 0                                            | 0                                                                  | 0                                                                    | 0                                                             | 0                                       | 0                           |
| 43           | 31,05 | 48                                                 | 31,19                              | 0                                                    | 0                                    | 0                                                      | 0                                                                    | 0                                                         | 0                                                          | 0                 | 0                     | 0                                                     | 0                                            | 0                                                                  | 0                                                                    | 0                                                             | 0                                       | 0                           |
| 46           | 31,54 | 46                                                 | 31,34                              | 0                                                    | 0                                    | 0                                                      | 0                                                                    | 0                                                         | 0                                                          | 0                 | 0                     | 0                                                     | 0                                            | 0                                                                  | 0                                                                    | 0                                                             | 0                                       | 0                           |
| 48           | 32,06 | 43                                                 | 31,61                              | 0                                                    | 0                                    | 0                                                      | 0                                                                    | 0                                                         | 0                                                          | 0                 | 0                     | 0                                                     | 0                                            | 0                                                                  | 0                                                                    | 0                                                             | 1                                       | 0                           |
| 47           | 35,19 | 47                                                 | 34,55                              | 0                                                    | 1                                    | 0                                                      | 0                                                                    | 0                                                         | 0                                                          | 0                 | 0                     | 0                                                     | 0                                            | 0                                                                  | 0                                                                    | 0                                                             | 0                                       | 0                           |
| 49           | 35,22 | 50                                                 | 35,83                              | 0                                                    | 0                                    | 0                                                      | 0                                                                    | 0                                                         | 0                                                          | 0                 | 0                     | 0                                                     | 0                                            | 0                                                                  | 0                                                                    | 0                                                             | 0                                       | 0                           |
| 50           | 36,36 | 49                                                 | 36,04                              | 0                                                    | 0                                    | 0                                                      | 0                                                                    | 0                                                         | 0                                                          | 0                 | 0                     | 0                                                     | 0                                            | 0                                                                  | 0                                                                    | 0                                                             | 0                                       | 0                           |

|              |       | 52                                    | 53                                     | 54                            | 55                                 | 56                             | 57                 | 58                                                                 | 59                                                | 60                                           | 61                                                   | 62                                            | 63                         | 64                                                                             | 65                                     | 66                      | 67                     | 68                                               |
|--------------|-------|---------------------------------------|----------------------------------------|-------------------------------|------------------------------------|--------------------------------|--------------------|--------------------------------------------------------------------|---------------------------------------------------|----------------------------------------------|------------------------------------------------------|-----------------------------------------------|----------------------------|--------------------------------------------------------------------------------|----------------------------------------|-------------------------|------------------------|--------------------------------------------------|
| Manufacturer |       | MEDsan GmbH                           | Merlin Biomedical (Xiamen) Co., Ltd.   | Mölab GmbH                    | MP Biomedicals Germany GmbH        | nal von minden GmbH            | NanoEntek Inc.     | Nanjing Norman Biological Technology Co.,Ltd                       | Nantong Diagnostics Biotechnology Co., Ltd.       | New Gene (Hangzhou) Bioengineering Co., Ltd. | Novatech Tibbi Cihaz Ürünleri San. Ve Tic. A.S.      | Oncosem Onkolojik Sistemler San. Ve Tic. A.S. | PCL, Inc.                  | PerGrande BioTech Development Co., Ltd.                                        | Precision Biosensor Inc. (Axon Lab AG) | ProGnosis Biotech       | Quidel Corporation     | Qingdao Hightop Biotech Co., Ltd.                |
| Test name    |       | MEDsan® SARS-CoV-2 Antigen Rapid Test | SARS-CoV-2 Antigen Rapid Test Cassette | mö-screen Corona Antigen Test | Rapid SARS-CoV-2 Antigen Test Card | NADAL® COVID-19 Ag Schnelltest | Frend™ COVID-19 Ag | Novel Coronavirus (2019-nCoV) Antigen Testing Kit (Colloidal Gold) | COVID-19 Antigen Saliva Test Kit (Colloidal Gold) | Covid-19-Antigen-Testkit                     | novacheck®-Ag SARS-CoV-2 Covid-19 Antigen Rapid Test | CAT Antigen Covid Rapid Test                  | PCL COVID19 Ag Gold Saliva | SARS-CoV-2 Antigen Detection Kit (Colloidal Gold Immuno-chromatographic Assay) | Exdia COVID-19-Ag Test                 | Rapid Test Ag 2019-nCoV | Sofia SARS Antigen FIA | Hightop SARS-CoV-2 (Covid-19) Antigen Rapid Test |
| Panel 1 V1   |       | Panel 1 V2                            |                                        | Panel 1 V1                    | Panel 1 V2                         | Panel 1 V1                     | Panel 1 V2         | Panel 1 V2                                                         | Panel 1 V2                                        | Panel 1 V2                                   | Panel 1 V2                                           | Panel 1 V2                                    | Panel 1 V2                 | Panel 1 V2                                                                     | Panel 1 V1                             | Panel 1 V2              | Panel 1 V1             | Panel 1 V2                                       |
| Pool Nr.     | Cq    | Pool Nr.                              | Cq                                     |                               |                                    |                                |                    |                                                                    |                                                   |                                              |                                                      |                                               |                            |                                                                                |                                        |                         |                        |                                                  |
| 1            | 17,55 | 1                                     | 17,31                                  | 1                             | 1                                  | 1                              | 1                  | 1                                                                  | 1                                                 | 1                                            | 1                                                    | 1                                             | 1                          | 1                                                                              | 1                                      | 1                       | 1                      | 1                                                |
| 6            | 20,20 | 2                                     | 19,08                                  | 1                             | 1                                  | 1                              | 1                  | 1                                                                  | 1                                                 | 1                                            | 1                                                    | 1                                             | 1                          | 1                                                                              | 1                                      | 1                       | 1                      | 1                                                |
| 5            | 20,28 | 3                                     | 19,62                                  | 1                             | 1                                  | 1                              | 1                  | 1                                                                  | 1                                                 | 1                                            | 1                                                    | 1                                             | 1                          | 1                                                                              | 1                                      | 1                       | 1                      | 1                                                |
| 3            | 20,38 | 5                                     | 20,60                                  | 1                             | 1                                  | 1                              | 1                  | 1                                                                  | 1                                                 | 1                                            | 1                                                    | 1                                             | 1                          | 1                                                                              | 1                                      | 1                       | 1                      | 1                                                |
| 2            | 20,54 | 4                                     | 20,61                                  | 1                             | 1                                  | 1                              | 1                  | 1                                                                  | 1                                                 | 1                                            | 1                                                    | 1                                             | 1                          | 1                                                                              | 1                                      | 1                       | 1                      | 1                                                |
| 4            | 20,98 | 6                                     | 21,21                                  | 1                             | 1                                  | 1                              | 1                  | 1                                                                  | 1                                                 | 1                                            | 1                                                    | 1                                             | 1                          | 1                                                                              | 1                                      | 1                       | 1                      | 1                                                |
| 7            | 21,71 | 12                                    | 22,12                                  | 1                             | 1                                  | 1                              | 1                  | 1                                                                  | 1                                                 | 1                                            | 1                                                    | 1                                             | 1                          | 1                                                                              | 1                                      | 1                       | 1                      | 1                                                |
| 12           | 21,82 | 7                                     | 22,15                                  | 1                             | 1                                  | 1                              | 1                  | 1                                                                  | 1                                                 | 1                                            | 1                                                    | 1                                             | 1                          | 1                                                                              | 1                                      | 1                       | 1                      | 1                                                |
| 8            | 21,95 | 8                                     | 22,32                                  | 1                             | 1                                  | 1                              | 1                  | 1                                                                  | 1                                                 | 1                                            | 1                                                    | 1                                             | 1                          | 1                                                                              | 1                                      | 1                       | 1                      | 1                                                |
| 9            | 22,14 | 16                                    | 22,88                                  | 1                             | 1                                  | 1                              | 1                  | 1                                                                  | 1                                                 | 1                                            | 1                                                    | 1                                             | 1                          | 1                                                                              | 1                                      | 0                       | 1                      | 1                                                |
| 11           | 22,34 | 9                                     | 23,13                                  | 1                             | 1                                  | 1                              | 1                  | 1                                                                  | 1                                                 | 1                                            | 1                                                    | 1                                             | 1                          | 1                                                                              | 1                                      | 1                       | 1                      | 1                                                |
| 16           | 22,55 | 11                                    | 23,13                                  | 1                             | 1                                  | 1                              | 1                  | 1                                                                  | 1                                                 | 1                                            | 1                                                    | 1                                             | 1                          | 1                                                                              | 1                                      | 1                       | 1                      | 1                                                |
| 10           | 22,88 | 10                                    | 23,21                                  | 1                             | 1                                  | 1                              | 1                  | 1                                                                  | 1                                                 | 1                                            | 1                                                    | 1                                             | 1                          | 1                                                                              | 1                                      | 1                       | 1                      | 1                                                |
| 13           | 23,32 | 15                                    | 24,38                                  | 1                             | 1                                  | 1                              | 0                  | 0                                                                  | 1                                                 | 1                                            | 1                                                    | 0                                             | 1                          | 1                                                                              | 1                                      | 1                       | 1                      | 1                                                |
| 17           | 24,00 | 23                                    | 24,45                                  | 1                             | 1                                  | 1                              | 1                  | 0                                                                  | 0                                                 | 1                                            | 0                                                    | 1                                             | 1                          | 1                                                                              | 1                                      | 1                       | 1                      | 1                                                |
| 23           | 24,04 | 17                                    | 24,81                                  | 1                             | 1                                  | 1                              | 0                  | 1                                                                  | 1                                                 | 1                                            | 1                                                    | 1                                             | 1                          | 1                                                                              | 1                                      | 1                       | 0                      | 1                                                |
| 15           | 24,14 | 14                                    | 24,97                                  | 1                             | 1                                  | 1                              | 1                  | 1                                                                  | 1                                                 | 1                                            | 1                                                    | 1                                             | 1                          | 1                                                                              | 1                                      | 1                       | 0                      | 1                                                |
| 14           | 24,28 | 25                                    | 25,07                                  | 1                             | 1                                  | 1                              | 0                  | 0                                                                  | 1                                                 | 1                                            | 1                                                    | 1                                             | 1                          | 0                                                                              | 1                                      | 1                       | 1                      | 1                                                |
| 27           | 25,14 | 24                                    | 25,20                                  | 1                             | 1                                  | 1                              | 0                  | 0                                                                  | 0                                                 | 1                                            | 0                                                    | 1                                             | 1                          | 0                                                                              | 1                                      | 1                       | 0                      | 1                                                |
| 24           | 25,24 | 13                                    | 25,29                                  | 0                             | 1                                  | 1                              | 0                  | 1                                                                  | 1                                                 | 1                                            | 1                                                    | 1                                             | 1                          | 0                                                                              | 1                                      | 1                       | 0                      | 1                                                |
| 31           | 25,27 | 19                                    | 25,45                                  | 0                             | 1                                  | 0                              | 1                  | 0                                                                  | 1                                                 | 1                                            | 0                                                    | 1                                             | 1                          | 0                                                                              | 1                                      | 1                       | 0                      | 1                                                |
| 18           | 25,30 | 21                                    | 25,95                                  | 1                             | 1                                  | 1                              | 0                  | 0                                                                  | 0                                                 | 1                                            | 0                                                    | 0                                             | 1                          | 0                                                                              | 1                                      | 1                       | 1                      | 0                                                |
| 26           | 25,47 | 27                                    | 26,12                                  | 1                             | 1                                  | 1                              | 1                  | 0                                                                  | 1                                                 | 1                                            | 0                                                    | 1                                             | 1                          | 0                                                                              | 1                                      | 0                       | 1                      | 1                                                |
| 19           | 25,50 | 31                                    | 26,24                                  | 1                             | 1                                  | 1                              | 0                  | 0                                                                  | 0                                                 | 0                                            | 0                                                    | 0                                             | 0                          | 0                                                                              | 1                                      | 1                       | 0                      | 0                                                |
| 21           | 25,54 | 26                                    | 26,32                                  | 1                             | 1                                  | 1                              | 1                  | 0                                                                  | 0                                                 | 1                                            | 0                                                    | 0                                             | 0                          | 1                                                                              | 0                                      | 1                       | 0                      | 0                                                |
| 22           | 25,87 | 32                                    | 26,64                                  | 1                             | 1                                  | 1                              | 0                  | 1                                                                  | 0                                                 | 0                                            | 0                                                    | 0                                             | 0                          | 0                                                                              | 1                                      | 1                       | 0                      | 0                                                |
| 20           | 26,27 | 35                                    | 26,66                                  | 1                             | 0                                  | 1                              | 0                  | 0                                                                  | 0                                                 | 1                                            | 0                                                    | 0                                             | 0                          | 0                                                                              | 1                                      | 0                       | 0                      | 1                                                |
| 32           | 26,44 | 36                                    | 27,05                                  | 1                             | 0                                  | 1                              | 0                  | 0                                                                  | 0                                                 | 0                                            | 0                                                    | 0                                             | 0                          | 1                                                                              | 0                                      | 1                       | 0                      | 0                                                |
| 35           | 27,04 | 30                                    | 27,24                                  | 1                             | 1                                  | 1                              | 0                  | 0                                                                  | 0                                                 | 1                                            | 1                                                    | 1                                             | 1                          | 0                                                                              | 1                                      | 1                       | 0                      | 0                                                |
| 28           | 27,14 | 29                                    | 27,34                                  | 0                             | 0                                  | 0                              | 0                  | 0                                                                  | 0                                                 | 0                                            | 1                                                    | 0                                             | 0                          | 1                                                                              | 0                                      | 0                       | 0                      | 1                                                |
| 29           | 27,15 | 28                                    | 27,41                                  | 0                             | 1                                  | 1                              | 0                  | 0                                                                  | 0                                                 | 0                                            | 1                                                    | 0                                             | 0                          | 1                                                                              | 1                                      | 1                       | 0                      | 0                                                |
| 40           | 27,65 | 22                                    | 27,42                                  | 0                             | 1                                  | 0                              | 1                  | 0                                                                  | 0                                                 | 1                                            | 1                                                    | 1                                             | 1                          | 0                                                                              | 0                                      | 1                       | 0                      | 1                                                |
| 34           | 27,89 | 34                                    | 27,82                                  | 0                             | 1                                  | 0                              | 0                  | 0                                                                  | 0                                                 | 0                                            | 1                                                    | 0                                             | 0                          | 0                                                                              | 0                                      | 0                       | 0                      | 0                                                |
| 36           | 28,13 | 40                                    | 28,19                                  | 0                             | 0                                  | 0                              | 0                  | 0                                                                  | 0                                                 | 0                                            | 0                                                    | 0                                             | 0                          | 0                                                                              | 1                                      | 0                       | 0                      | 0                                                |
| 38           | 28,14 | 18                                    | 28,33                                  | 1                             | 1                                  | 0                              | 1                  | 0                                                                  | 1                                                 | 1                                            | 1                                                    | 1                                             | 1                          | 0                                                                              | 1                                      | 1                       | 0                      | 1                                                |
| 42           | 28,43 | 33                                    | 28,92                                  | 1                             | 0                                  | 0                              | 0                  | 0                                                                  | 0                                                 | 0                                            | 0                                                    | 0                                             | 0                          | 1                                                                              | 0                                      | 1                       | 0                      | 0                                                |
| 30           | 28,86 | 38                                    | 29,36                                  | 0                             | 0                                  | 0                              | 0                  | 0                                                                  | 0                                                 | 1                                            | 1                                                    | 0                                             | 0                          | 0                                                                              | 1                                      | 0                       | 0                      | 0                                                |
| 33           | 28,96 | 20                                    | 29,46                                  | 0                             | 1                                  | 0                              | 0                  | 0                                                                  | 0                                                 | 1                                            | 1                                                    | 0                                             | 1                          | 0                                                                              | 0                                      | 1                       | 0                      | 1                                                |
| 44           | 29,24 | 42                                    | 29,48                                  | 0                             | 0                                  | 0                              | 0                  | 0                                                                  | 0                                                 | 0                                            | 1                                                    | 0                                             | 0                          | 0                                                                              | 0                                      | 0                       | 0                      | 0                                                |
| 25           | 29,70 | 44                                    | 29,51                                  | 0                             | 0                                  | 1                              | 0                  | 0                                                                  | 0                                                 | 0                                            | 0                                                    | 0                                             | 0                          | 0                                                                              | 1                                      | 0                       | 0                      | 0                                                |
| 39           | 29,76 | 39                                    | 30,12                                  | 0                             | 0                                  | 0                              | 0                  | 0                                                                  | 0                                                 | 0                                            | 0                                                    | 0                                             | 0                          | 0                                                                              | 0                                      | 0                       | 0                      | 0                                                |
| 45           | 30,10 | 37                                    | 30,13                                  | 0                             | 0                                  | 0                              | 0                  | 0                                                                  | 0                                                 | 0                                            | 0                                                    | 0                                             | 0                          | 0                                                                              | 0                                      | 1                       | 0                      | 0                                                |
| 41           | 30,13 | 41                                    | 30,14                                  | 0                             | 0                                  | 0                              | 0                  | 0                                                                  | 0                                                 | 0                                            | 1                                                    | 0                                             | 0                          | 0                                                                              | 0                                      | 0                       | 0                      | 0                                                |
| 37           | 30,54 | 45                                    | 31,19                                  | 0                             | 0                                  | 0                              | 0                  | 0                                                                  | 0                                                 | 0                                            | 0                                                    | 0                                             | 0                          | 0                                                                              | 0                                      | 0                       | 0                      | 0                                                |
| 43           | 31,05 | 48                                    | 31,19                                  | 0                             | 0                                  | 0                              | 0                  | 0                                                                  | 0                                                 | 0                                            | 0                                                    | 0                                             | 0                          | 0                                                                              | 0                                      | 0                       | 0                      | 0                                                |
| 46           | 31,54 | 46                                    | 31,34                                  | 0                             | 0                                  | 0                              | 0                  | 0                                                                  | 0                                                 | 0                                            | 0                                                    | 0                                             | 0                          | 0                                                                              | 0                                      | 0                       | 0                      | 0                                                |
| 48           | 32,06 | 43                                    | 31,61                                  | 0                             | 0                                  | 0                              | 0                  | 0                                                                  | 0                                                 | 1                                            | 0                                                    | 0                                             | 0                          | 0                                                                              | 0                                      | 0                       | 0                      | 0                                                |
| 47           | 35,19 | 47                                    | 34,55                                  | 0                             | 0                                  | 0                              | 0                  | 0                                                                  | 0                                                 | 0                                            | 0                                                    | 0                                             | 0                          | 0                                                                              | 0                                      | 0                       | 0                      | 0                                                |
| 49           | 35,22 | 50                                    | 35,83                                  | 0                             | 0                                  | 0                              | 0                  | 0                                                                  | 0                                                 | 0                                            | 0                                                    | 0                                             | 0                          | 0                                                                              | 0                                      | 0                       | 0                      | 0                                                |
| 50           | 36,36 | 49                                    | 36,04                                  | 0                             | 0                                  | 0                              | 0                  | 0                                                                  | 0                                                 | 0                                            | 0                                                    | 0                                             | 0                          | 0                                                                              | 0                                      | 0                       | 0                      | 0                                                |



|              |       | 69                            | 70                                         | 71                                                                   | 72                              | 73                                    | 74                          | 75                           | 76                                                   | 77                                                               | 78                                                                                                  | 79                                                  | 80                                                      | 81                                              | 82                                     | 83                    | 84                 | 85                                                  |            |
|--------------|-------|-------------------------------|--------------------------------------------|----------------------------------------------------------------------|---------------------------------|---------------------------------------|-----------------------------|------------------------------|------------------------------------------------------|------------------------------------------------------------------|-----------------------------------------------------------------------------------------------------|-----------------------------------------------------|---------------------------------------------------------|-------------------------------------------------|----------------------------------------|-----------------------|--------------------|-----------------------------------------------------|------------|
| Manufacturer |       | R-Biopharm AG                 | Safecare Biotech Hangzhou Co., Ltd.        | Salofa OY                                                            | ScheBo Biotech AG               | SD BIOSENSOR (Roche Diagnostics GmbH) | SD BIOSENSOR                | SD BIOSENSOR                 | SGA Mühendislik DAN. EĞ. İcve DIS.Ltd.STI)           | Shenzhen Lvshiyuan Biotechnology Co., Ltd.                       | Shenzhen Microprofit Biotech Co., Ltd.                                                              | Shenzhen Watmind Medical Co.,Ltd.                   | Shenzhen Watmind Medical Co.,Ltd.                       | Shenzhen Zhenrui Biotech co.Ltd.                | Siemens Healthineers                   | Sugentech, Inc.       | Toda Pharma        | Triplex International Biosciences (China) Co., Ltd. |            |
| Test name    |       | RIDA*QUICK SARS-CoV-2 Antigen | Safecare COVID-19 Ag Rapid Test Kit (Swab) | salocor SARS-CoV-2 Antigen Rapid Test Cassette (Nasopharyngeal swab) | ScheBo SARS-CoV-2 Quick Antigen | SARS-CoV-2 Rapid Antigen Test         | STANDARD™ F COVID-19 Ag FIA | STANDARD™ Q COVID-19 Ag Test | V-Chek SARS-CoV-2 Rapid Ag Test Kit (Collaidal Gold) | Green Spring SARS-CoV-2 Antigen Rapid Test Kit (Collaoidal Gold) | fluorecare COVID-19 SARS-CoV-2 Spike Protein Test Kit (Collaoidal Gold Chromatographic Immunoassay) | SARS-CoV-2 Ag Diagnostic Test Kit (Collaoidal Gold) | SARS-CoV-2 Ag Diagnostic Test Kit (Immuno-fluorescence) | Zhenrui COVID-19 (SARS-COV-2) Antigen Test Kits | CLINITEST® Rapid COVID-19 Antigen Test | SGTI-flex COVID-19 Ag | Toda Coronadiag Ag | SARS-CoV-2 Antigen Rapid Test Kit                   |            |
| Panel 1 V1   |       | Panel 1 V2                    |                                            | Panel 1 V1                                                           | Panel 1 V2                      | Panel 1 V2                            | Panel 1 V1                  | Panel 1 V1                   | Panel 1 V1                                           | Panel 1 V2                                                       | Panel 1 V2                                                                                          | Panel 1 V2                                          | Panel 1 V2                                              | Panel 1 V2                                      | Panel 1 V2                             | Panel 1 V1            | Panel 1 V2         | Panel 1 V2                                          | Panel 1 V2 |
| Pool Nr.     | Cq    | Pool Nr.                      | Cq                                         |                                                                      |                                 |                                       |                             |                              |                                                      |                                                                  |                                                                                                     |                                                     |                                                         |                                                 |                                        |                       |                    |                                                     |            |
| 1            | 17,55 | 1                             | 17,31                                      | 1                                                                    | 1                               | 1                                     | 1                           | 1                            | 1                                                    | 1                                                                | 1                                                                                                   | 1                                                   | 1                                                       | 1                                               | 1                                      | 1                     | 1                  | 1                                                   | 1          |
| 6            | 20,20 | 2                             | 19,08                                      | 1                                                                    | 1                               | 1                                     | 1                           | 1                            | 1                                                    | 1                                                                | 1                                                                                                   | 1                                                   | 1                                                       | 1                                               | 1                                      | 1                     | 1                  | 1                                                   | 1          |
| 5            | 20,28 | 3                             | 19,62                                      | 1                                                                    | 1                               | 1                                     | 1                           | 1                            | 1                                                    | 1                                                                | 1                                                                                                   | 1                                                   | 1                                                       | 1                                               | 1                                      | 1                     | 1                  | 1                                                   | 1          |
| 3            | 20,38 | 5                             | 20,60                                      | 1                                                                    | 1                               | 1                                     | 1                           | 1                            | 1                                                    | 1                                                                | 1                                                                                                   | 1                                                   | 1                                                       | 1                                               | 1                                      | 1                     | 1                  | 1                                                   | 1          |
| 2            | 20,54 | 4                             | 20,61                                      | 1                                                                    | 1                               | 1                                     | 1                           | 1                            | 1                                                    | 1                                                                | 1                                                                                                   | 1                                                   | 1                                                       | 1                                               | 1                                      | 1                     | 1                  | 1                                                   | 1          |
| 4            | 20,98 | 6                             | 21,21                                      | 1                                                                    | 1                               | 1                                     | 1                           | 1                            | 1                                                    | 1                                                                | 1                                                                                                   | 1                                                   | 1                                                       | 1                                               | 1                                      | 1                     | 1                  | 1                                                   | 1          |
| 7            | 21,71 | 12                            | 22,12                                      | 1                                                                    | 1                               | 1                                     | 1                           | 1                            | 1                                                    | 1                                                                | 1                                                                                                   | 1                                                   | 1                                                       | 1                                               | 1                                      | 1                     | 1                  | 1                                                   | 1          |
| 12           | 21,82 | 7                             | 22,15                                      | 1                                                                    | 1                               | 1                                     | 1                           | 1                            | 1                                                    | 1                                                                | 1                                                                                                   | 1                                                   | 1                                                       | 1                                               | 1                                      | 1                     | 1                  | 1                                                   | 1          |
| 8            | 21,95 | 8                             | 22,32                                      | 1                                                                    | 1                               | 1                                     | 1                           | 1                            | 1                                                    | 1                                                                | 1                                                                                                   | 1                                                   | 1                                                       | 1                                               | 1                                      | 1                     | 1                  | 1                                                   | 1          |
| 9            | 22,14 | 16                            | 22,88                                      | 1                                                                    | 1                               | 1                                     | 1                           | 1                            | 1                                                    | 1                                                                | 1                                                                                                   | 1                                                   | 1                                                       | 1                                               | 1                                      | 1                     | 1                  | 1                                                   | 1          |
| 11           | 22,34 | 9                             | 23,13                                      | 1                                                                    | 1                               | 1                                     | 1                           | 1                            | 1                                                    | 1                                                                | 1                                                                                                   | 1                                                   | 1                                                       | 1                                               | 1                                      | 1                     | 1                  | 1                                                   | 1          |
| 16           | 22,55 | 11                            | 23,13                                      | 1                                                                    | 1                               | 0                                     | 1                           | 1                            | 1                                                    | 1                                                                | 1                                                                                                   | 1                                                   | 1                                                       | 1                                               | 1                                      | 1                     | 1                  | 1                                                   | 1          |
| 10           | 22,88 | 10                            | 23,21                                      | 1                                                                    | 1                               | 1                                     | 1                           | 1                            | 1                                                    | 1                                                                | 1                                                                                                   | 1                                                   | 1                                                       | 1                                               | 1                                      | 1                     | 1                  | 1                                                   | 1          |
| 13           | 23,32 | 15                            | 24,38                                      | 1                                                                    | 1                               | 0                                     | 1                           | 1                            | 1                                                    | 1                                                                | 1                                                                                                   | 1                                                   | 1                                                       | 1                                               | 0                                      | 1                     | 1                  | 1                                                   | 1          |
| 17           | 24,00 | 23                            | 24,45                                      | 1                                                                    | 1                               | 0                                     | 1                           | 1                            | 1                                                    | 0                                                                | 1                                                                                                   | 1                                                   | 1                                                       | 1                                               | 0                                      | 1                     | 1                  | 1                                                   | 1          |
| 23           | 24,04 | 17                            | 24,81                                      | 1                                                                    | 1                               | 1                                     | 1                           | 0                            | 1                                                    | 1                                                                | 1                                                                                                   | 1                                                   | 1                                                       | 1                                               | 1                                      | 1                     | 1                  | 1                                                   | 1          |
| 15           | 24,14 | 14                            | 24,97                                      | 1                                                                    | 1                               | 1                                     | 1                           | 0                            | 1                                                    | 0                                                                | 1                                                                                                   | 1                                                   | 1                                                       | 1                                               | 0                                      | 1                     | 1                  | 1                                                   | 1          |
| 14           | 24,28 | 25                            | 25,07                                      | 1                                                                    | 1                               | 1                                     | 1                           | 1                            | 1                                                    | 1                                                                | 1                                                                                                   | 1                                                   | 1                                                       | 1                                               | 1                                      | 1                     | 1                  | 1                                                   | 1          |
| 27           | 25,14 | 24                            | 25,20                                      | 0                                                                    | 1                               | 0                                     | 1                           | 1                            | 1                                                    | 0                                                                | 1                                                                                                   | 1                                                   | 1                                                       | 1                                               | 0                                      | 1                     | 1                  | 1                                                   | 1          |
| 24           | 25,24 | 13                            | 25,29                                      | 1                                                                    | 1                               | 1                                     | 1                           | 0                            | 1                                                    | 1                                                                | 1                                                                                                   | 1                                                   | 1                                                       | 1                                               | 1                                      | 1                     | 1                  | 1                                                   | 1          |
| 31           | 25,27 | 19                            | 25,45                                      | 0                                                                    | 1                               | 0                                     | 1                           | 0                            | 0                                                    | 0                                                                | 1                                                                                                   | 1                                                   | 1                                                       | 1                                               | 0                                      | 1                     | 1                  | 1                                                   | 1          |
| 18           | 25,30 | 21                            | 25,95                                      | 1                                                                    | 1                               | 0                                     | 1                           | 1                            | 1                                                    | 1                                                                | 1                                                                                                   | 1                                                   | 1                                                       | 1                                               | 0                                      | 1                     | 0                  | 1                                                   | 1          |
| 26           | 25,47 | 27                            | 26,12                                      | 1                                                                    | 1                               | 0                                     | 1                           | 1                            | 1                                                    | 1                                                                | 1                                                                                                   | 1                                                   | 1                                                       | 1                                               | 0                                      | 1                     | 1                  | 1                                                   | 1          |
| 19           | 25,50 | 31                            | 26,24                                      | 0                                                                    | 0                               | 0                                     | 1                           | 1                            | 1                                                    | 0                                                                | 1                                                                                                   | 0                                                   | 1                                                       | 0                                               | 1                                      | 1                     | 1                  | 1                                                   | 1          |
| 21           | 25,54 | 26                            | 26,32                                      | 1                                                                    | 1                               | 0                                     | 1                           | 0                            | 1                                                    | 0                                                                | 1                                                                                                   | 0                                                   | 1                                                       | 0                                               | 1                                      | 1                     | 1                  | 1                                                   | 1          |
| 22           | 25,87 | 32                            | 26,64                                      | 0                                                                    | 0                               | 0                                     | 1                           | 1                            | 1                                                    | 0                                                                | 1                                                                                                   | 0                                                   | 1                                                       | 0                                               | 1                                      | 0                     | 1                  | 1                                                   | 1          |
| 20           | 26,27 | 35                            | 26,66                                      | 0                                                                    | 1                               | 0                                     | 1                           | 0                            | 1                                                    | 0                                                                | 1                                                                                                   | 0                                                   | 1                                                       | 1                                               | 0                                      | 1                     | 1                  | 1                                                   | 1          |
| 32           | 26,44 | 36                            | 27,05                                      | 0                                                                    | 1                               | 0                                     | 1                           | 0                            | 0                                                    | 0                                                                | 1                                                                                                   | 1                                                   | 1                                                       | 1                                               | 0                                      | 1                     | 1                  | 1                                                   | 1          |
| 35           | 27,04 | 30                            | 27,24                                      | 0                                                                    | 1                               | 0                                     | 1                           | 1                            | 1                                                    | 0                                                                | 1                                                                                                   | 0                                                   | 1                                                       | 1                                               | 1                                      | 1                     | 1                  | 1                                                   | 1          |
| 28           | 27,14 | 29                            | 27,34                                      | 0                                                                    | 1                               | 0                                     | 1                           | 0                            | 1                                                    | 0                                                                | 1                                                                                                   | 0                                                   | 1                                                       | 0                                               | 1                                      | 1                     | 1                  | 1                                                   | 1          |
| 29           | 27,15 | 28                            | 27,41                                      | 0                                                                    | 0                               | 0                                     | 1                           | 0                            | 0                                                    | 1                                                                | 0                                                                                                   | 1                                                   | 0                                                       | 0                                               | 1                                      | 1                     | 1                  | 1                                                   | 1          |
| 40           | 27,65 | 22                            | 27,42                                      | 0                                                                    | 1                               | 0                                     | 1                           | 0                            | 0                                                    | 1                                                                | 1                                                                                                   | 1                                                   | 1                                                       | 1                                               | 0                                      | 1                     | 1                  | 1                                                   | 1          |
| 34           | 27,89 | 34                            | 27,82                                      | 0                                                                    | 0                               | 0                                     | 1                           | 0                            | 1                                                    | 0                                                                | 1                                                                                                   | 1                                                   | 1                                                       | 0                                               | 0                                      | 1                     | 1                  | 1                                                   | 1          |
| 36           | 28,13 | 40                            | 28,19                                      | 0                                                                    | 0                               | N/A                                   | 1                           | 1                            | 1                                                    | 1                                                                | 0                                                                                                   | 1                                                   | 0                                                       | 0                                               | 1                                      | 0                     | 1                  | 0                                                   | 0          |
| 38           | 28,14 | 18                            | 28,33                                      | 0                                                                    | 1                               | 1                                     | 1                           | 0                            | 1                                                    | 1                                                                | 1                                                                                                   | 1                                                   | 1                                                       | 1                                               | 1                                      | 1                     | 1                  | 1                                                   | 1          |
| 42           | 28,43 | 33                            | 28,92                                      | 0                                                                    | 0                               | 0                                     | 0                           | 0                            | 0                                                    | N/A                                                              | 1                                                                                                   | 0                                                   | 1                                                       | 0                                               | 0                                      | 1                     | 0                  | 1                                                   | 0          |
| 30           | 28,86 | 38                            | 29,36                                      | 0                                                                    | 1                               | 0                                     | 1                           | 0                            | 0                                                    | 0                                                                | 1                                                                                                   | 0                                                   | 1                                                       | 1                                               | 0                                      | 1                     | 1                  | 1                                                   | 1          |
| 33           | 28,96 | 20                            | 29,46                                      | 0                                                                    | 0                               | 0                                     | 1                           | 0                            | 0                                                    | 1                                                                | 1                                                                                                   | 1                                                   | 1                                                       | 1                                               | 0                                      | 1                     | 1                  | 1                                                   | 1          |
| 44           | 29,24 | 42                            | 29,48                                      | 0                                                                    | 0                               | 1                                     | 0                           | 0                            | 0                                                    | 0                                                                | 1                                                                                                   | 0                                                   | 1                                                       | 0                                               | 0                                      | 0                     | 0                  | 1                                                   | 1          |
| 25           | 29,70 | 44                            | 29,51                                      | 0                                                                    | 0                               | 0                                     | 0                           | 1                            | 0                                                    | 0                                                                | 0                                                                                                   | 0                                                   | 0                                                       | 0                                               | 1                                      | 0                     | 0                  | 0                                                   | 0          |
| 39           | 29,76 | 39                            | 30,12                                      | 0                                                                    | 0                               | 0                                     | 0                           | 0                            | 0                                                    | 1                                                                | 0                                                                                                   | 0                                                   | 0                                                       | 0                                               | 0                                      | 0                     | 0                  | 0                                                   | 0          |
| 45           | 30,10 | 37                            | 30,13                                      | 0                                                                    | 0                               | 0                                     | 0                           | 0                            | 0                                                    | 0                                                                | 1                                                                                                   | 1                                                   | 1                                                       | 0                                               | 0                                      | 0                     | 1                  | 0                                                   | 0          |
| 41           | 30,13 | 41                            | 30,14                                      | 0                                                                    | 0                               | 0                                     | 0                           | 0                            | 0                                                    | 0                                                                | 0                                                                                                   | 0                                                   | 1                                                       | 0                                               | 0                                      | 0                     | 0                  | 0                                                   | 1          |
| 37           | 30,54 | 45                            | 31,19                                      | 0                                                                    | 0                               | 0                                     | 1                           | 0                            | 0                                                    | 0                                                                | 0                                                                                                   | 0                                                   | 0                                                       | 0                                               | 0                                      | 0                     | 1                  | 0                                                   | 0          |
| 43           | 31,05 | 48                            | 31,19                                      | 0                                                                    | 0                               | 0                                     | 0                           | 0                            | 0                                                    | 0                                                                | 0                                                                                                   | 0                                                   | 0                                                       | 0                                               | 0                                      | 0                     | 0                  | 0                                                   | 0          |
| 46           | 31,54 | 46                            | 31,34                                      | 0                                                                    | 0                               | 0                                     | 0                           | 0                            | 0                                                    | 1                                                                | 0                                                                                                   | 0                                                   | 0                                                       | 0                                               | 0                                      | 0                     | 1                  | 0                                                   | 0          |
| 48           | 32,06 | 43                            | 31,61                                      | 0                                                                    | 0                               | 0                                     | 0                           | 0                            | 0                                                    | 0                                                                | 0                                                                                                   | 0                                                   | 0                                                       | 0                                               | 0                                      | 0                     | 0                  | 0                                                   | 1          |
| 47           | 35,19 | 47                            | 34,55                                      | 0                                                                    | 0                               | 0                                     | 0                           | 0                            | 0                                                    | 1                                                                | 0                                                                                                   | 0                                                   | 0                                                       | 0                                               | 0                                      | 0                     | 1                  | 0                                                   | 0          |
| 49           | 35,22 | 50                            | 35,83                                      | 0                                                                    | 0                               | 0                                     | 0                           | 0                            | 0                                                    | 0                                                                | 0                                                                                                   | 0                                                   | 0                                                       | 0                                               | 0                                      | 0                     | 0                  | 0                                                   | 0          |
| 50           | 36,36 | 49                            | 36,04                                      | 0                                                                    | 0                               | 0                                     | 0                           | 0                            | 0                                                    | 0                                                                | 0                                                                                                   | 0                                                   | 0                                                       | 0                                               | 0                                      | 0                     | 0                  | 0                                                   | 0          |

|              |           | 86                                                    | 87                                                    | 88                                                                | 89                                       | 90                                                  | 91                                      | 92                             | 93                                       | 94                                            | 95                                                      | 96                                        |
|--------------|-----------|-------------------------------------------------------|-------------------------------------------------------|-------------------------------------------------------------------|------------------------------------------|-----------------------------------------------------|-----------------------------------------|--------------------------------|------------------------------------------|-----------------------------------------------|---------------------------------------------------------|-------------------------------------------|
| Manufacturer | Test name | ulti med Products (Deutschland) GmbH                  | Vitrosens Biyoteknoloji Ltd. Sti                      | Wantai (Beijing) Wantai Biological Pharmacy Enterprise Co., Ltd.) | Wuhan EasyDiagnosis Biomedicine Co., Ltd | Wuhan Life Origin Biotech Joint Stock Co., Ltd.     | Wuhan UnScience Biotechnology Co., Ltd. | Xiamen Boson Biotech Co., Ltd. | Xiamen WIZ Biotech Co., Ltd.             | Zet Medikal Tekstil Dis Ticaret Ltd. STI.     | Zhejiang Anji Saianfu Biotech Co.,Ltd.                  | Zhejiang Orient Gene Biotech Co.,Ltd      |
|              |           | COVID-19 Antigen Speicheltest (Immunochromatographie) | RapidFor SARS-CoV-2 Rapid Antigen Test Colloidal Gold | SARS-CoV-2 Ag Rapid Test (FIA)                                    | COVID-19 (SARS-CoV-2) Antigen Test Kit   | SARS-CoV-2 Antigen Assay Kit (Immunochromatography) | SARS-CoV-2 Antigen Rapid Test Kit       | SARS-CoV-2 Antigen Schnelltest | Wizbiotech SARS-CoV-2 Antigen Rapid Test | softec SARS COV-2 (Covid-19) Antigen Test Kit | reOpenTest COVID-19 Antigen Rapid Test (Colloidal Gold) | Coronavirus Ag Rapid Test Cassette (Swab) |
| Panel 1 V1   |           | Panel 1 V2                                            |                                                       | Panel 1 V2                                                        | Panel 1 V2                               | Panel 1 V1                                          | Panel 1 V2                              | Panel 1 V2                     | Panel 1 V2                               | Panel 1 V2                                    | Panel 1 V2                                              | Panel 1 V1                                |
| Pool Nr.     | Cq        | Pool Nr.                                              | Cq                                                    |                                                                   |                                          |                                                     |                                         |                                |                                          |                                               |                                                         |                                           |
| 1            | 17,55     | 1                                                     | 17,31                                                 | 1                                                                 | 1                                        | 1                                                   | 1                                       | 1                              | 1                                        | 1                                             | 1                                                       | 1                                         |
| 6            | 20,20     | 2                                                     | 19,08                                                 | 1                                                                 | 1                                        | 1                                                   | 1                                       | 1                              | 1                                        | 1                                             | 1                                                       | 1                                         |
| 5            | 20,28     | 3                                                     | 19,62                                                 | 1                                                                 | 1                                        | 1                                                   | 1                                       | 1                              | 1                                        | 1                                             | 1                                                       | 1                                         |
| 3            | 20,38     | 5                                                     | 20,60                                                 | 1                                                                 | 1                                        | 1                                                   | 1                                       | 1                              | 1                                        | 1                                             | 1                                                       | 1                                         |
| 2            | 20,54     | 4                                                     | 20,61                                                 | 1                                                                 | 1                                        | 1                                                   | 1                                       | 1                              | 1                                        | 1                                             | 0                                                       | 1                                         |
| 4            | 20,98     | 6                                                     | 21,21                                                 | 1                                                                 | 1                                        | 1                                                   | 1                                       | 1                              | 1                                        | 1                                             | 1                                                       | 1                                         |
| 7            | 21,71     | 12                                                    | 22,12                                                 | 1                                                                 | 1                                        | 1                                                   | 1                                       | 1                              | 1                                        | 1                                             | 1                                                       | 1                                         |
| 12           | 21,82     | 7                                                     | 22,15                                                 | 1                                                                 | 1                                        | 1                                                   | 1                                       | 1                              | 1                                        | 1                                             | 1                                                       | 1                                         |
| 8            | 21,95     | 8                                                     | 22,32                                                 | 1                                                                 | 1                                        | 1                                                   | 1                                       | 1                              | 1                                        | 1                                             | 1                                                       | 1                                         |
| 9            | 22,14     | 16                                                    | 22,88                                                 | 1                                                                 | 1                                        | 1                                                   | 1                                       | 1                              | 1                                        | 1                                             | 1                                                       | 1                                         |
| 11           | 22,34     | 9                                                     | 23,13                                                 | 1                                                                 | 1                                        | 1                                                   | 1                                       | 1                              | 1                                        | 1                                             | 1                                                       | 1                                         |
| 16           | 22,55     | 11                                                    | 23,13                                                 | 1                                                                 | 1                                        | 1                                                   | 1                                       | 1                              | 1                                        | 1                                             | 1                                                       | 1                                         |
| 10           | 22,88     | 10                                                    | 23,21                                                 | 1                                                                 | 1                                        | 1                                                   | 1                                       | 1                              | 1                                        | 0                                             | 1                                                       | 1                                         |
| 13           | 23,32     | 15                                                    | 24,38                                                 | 1                                                                 | 1                                        | 1                                                   | 1                                       | 0                              | 1                                        | 0                                             | 1                                                       | 1                                         |
| 17           | 24,00     | 23                                                    | 24,45                                                 | 1                                                                 | 1                                        | 1                                                   | 1                                       | 0                              | 1                                        | 0                                             | 0                                                       | 1                                         |
| 23           | 24,04     | 17                                                    | 24,81                                                 | 1                                                                 | 1                                        | 1                                                   | 1                                       | 1                              | 1                                        | 1                                             | 1                                                       | 1                                         |
| 15           | 24,14     | 14                                                    | 24,97                                                 | 1                                                                 | 1                                        | 1                                                   | 1                                       | 1                              | 1                                        | 1                                             | 1                                                       | 1                                         |
| 14           | 24,28     | 25                                                    | 25,07                                                 | 1                                                                 | 1                                        | 1                                                   | 1                                       | 1                              | 0                                        | 1                                             | 1                                                       | 1                                         |
| 27           | 25,14     | 24                                                    | 25,20                                                 | 1                                                                 | 0                                        | 1                                                   | 1                                       | 0                              | 1                                        | 0                                             | 0                                                       | 1                                         |
| 24           | 25,24     | 13                                                    | 25,29                                                 | 1                                                                 | 1                                        | 1                                                   | 1                                       | 1                              | 1                                        | 1                                             | 1                                                       | 1                                         |
| 31           | 25,27     | 19                                                    | 25,45                                                 | 1                                                                 | 1                                        | 1                                                   | 1                                       | 1                              | 1                                        | 0                                             | 1                                                       | 1                                         |
| 18           | 25,30     | 21                                                    | 25,95                                                 | 1                                                                 | 0                                        | 1                                                   | 1                                       | 0                              | 1                                        | 0                                             | 0                                                       | 1                                         |
| 26           | 25,47     | 27                                                    | 26,12                                                 | 1                                                                 | 1                                        | 1                                                   | 1                                       | 0                              | 1                                        | 0                                             | 0                                                       | 1                                         |
| 19           | 25,50     | 31                                                    | 26,24                                                 | 1                                                                 | 0                                        | 1                                                   | 1                                       | 0                              | 0                                        | 0                                             | invalid                                                 | 0                                         |
| 21           | 25,54     | 26                                                    | 26,32                                                 | 1                                                                 | 0                                        | 1                                                   | 1                                       | 0                              | 1                                        | 0                                             | 1                                                       | 0                                         |
| 22           | 25,87     | 32                                                    | 26,64                                                 | 1                                                                 | 0                                        | 1                                                   | 1                                       | 0                              | 0                                        | 0                                             | 0                                                       | 1                                         |
| 20           | 26,27     | 35                                                    | 26,66                                                 | 1                                                                 | 0                                        | 1                                                   | 1                                       | 0                              | 0                                        | 0                                             | 0                                                       | 1                                         |
| 32           | 26,44     | 36                                                    | 27,05                                                 | 1                                                                 | 0                                        | 1                                                   | 1                                       | 0                              | 1                                        | 0                                             | 0                                                       | 1                                         |
| 35           | 27,04     | 30                                                    | 27,24                                                 | 1                                                                 | 0                                        | 1                                                   | 1                                       | 0                              | 0                                        | 0                                             | 0                                                       | 1                                         |
| 28           | 27,14     | 29                                                    | 27,34                                                 | 1                                                                 | 0                                        | 1                                                   | 1                                       | 0                              | 0                                        | 0                                             | 0                                                       | 1                                         |
| 29           | 27,15     | 28                                                    | 27,41                                                 | 1                                                                 | 0                                        | 1                                                   | 0                                       | 0                              | 0                                        | 0                                             | 0                                                       | 1                                         |
| 40           | 27,65     | 22                                                    | 27,42                                                 | 1                                                                 | 1                                        | 0                                                   | 1                                       | 1                              | 0                                        | 1                                             | 1                                                       | 0                                         |
| 34           | 27,89     | 34                                                    | 27,82                                                 | 1                                                                 | 0                                        | 1                                                   | 0                                       | 0                              | 0                                        | 0                                             | 0                                                       | 1                                         |
| 36           | 28,13     | 40                                                    | 28,19                                                 | 1                                                                 | 0                                        | 1                                                   | 0                                       | 0                              | 0                                        | 0                                             | N/A                                                     | 0                                         |
| 38           | 28,14     | 18                                                    | 28,33                                                 | 1                                                                 | 1                                        | 1                                                   | 1                                       | 1                              | 1                                        | 1                                             | N/A                                                     | 1                                         |
| 42           | 28,43     | 33                                                    | 28,92                                                 | 1                                                                 | 0                                        | 0                                                   | 0                                       | 0                              | 0                                        | 0                                             | N/A                                                     | 0                                         |
| 30           | 28,86     | 38                                                    | 29,36                                                 | 1                                                                 | 0                                        | 1                                                   | 1                                       | 0                              | 0                                        | 0                                             | 0                                                       | 1                                         |
| 33           | 28,96     | 20                                                    | 29,46                                                 | 1                                                                 | 1                                        | 0                                                   | 1                                       | 0                              | 0                                        | 0                                             | 0                                                       | 1                                         |
| 44           | 29,24     | 42                                                    | 29,48                                                 | 0                                                                 | 0                                        | 0                                                   | 0                                       | 0                              | 0                                        | 0                                             | 0                                                       | 0                                         |
| 25           | 29,70     | 44                                                    | 29,51                                                 | 0                                                                 | 0                                        | 1                                                   | 0                                       | 0                              | 0                                        | 0                                             | 0                                                       | 1                                         |
| 39           | 29,76     | 39                                                    | 30,12                                                 | 0                                                                 | 0                                        | 0                                                   | 0                                       | 0                              | 0                                        | 0                                             | invalid                                                 | 0                                         |
| 45           | 30,10     | 37                                                    | 30,13                                                 | 0                                                                 | 0                                        | 0                                                   | 0                                       | 0                              | 0                                        | 0                                             | 0                                                       | 0                                         |
| 41           | 30,13     | 41                                                    | 30,14                                                 | 1                                                                 | 0                                        | 0                                                   | 0                                       | 0                              | 0                                        | 0                                             | 0                                                       | 0                                         |
| 37           | 30,54     | 45                                                    | 31,19                                                 | 0                                                                 | 0                                        | 0                                                   | 0                                       | 0                              | 0                                        | 0                                             | N/A                                                     | 0                                         |
| 43           | 31,05     | 48                                                    | 31,19                                                 | 0                                                                 | 0                                        | 0                                                   | 0                                       | 0                              | 0                                        | 0                                             | invalid                                                 | 0                                         |
| 46           | 31,54     | 46                                                    | 31,34                                                 | 1                                                                 | 0                                        | 0                                                   | 0                                       | 0                              | 0                                        | 0                                             | invalid                                                 | 0                                         |
| 48           | 32,06     | 43                                                    | 31,61                                                 | 0                                                                 | 0                                        | 0                                                   | 0                                       | 0                              | 0                                        | 0                                             | 0                                                       | 0                                         |
| 47           | 35,19     | 47                                                    | 34,55                                                 | 0                                                                 | 0                                        | 0                                                   | 0                                       | 0                              | 0                                        | 0                                             | 0                                                       | 0                                         |
| 49           | 35,22     | 50                                                    | 35,83                                                 | 0                                                                 | 0                                        | 0                                                   | 0                                       | 0                              | 0                                        | 0                                             | 1                                                       | 0                                         |
| 50           | 36,36     | 49                                                    | 36,04                                                 | 0                                                                 | 0                                        | 0                                                   | 0                                       | 0                              | 0                                        | 0                                             | invalid                                                 | 0                                         |

**Figure 2**  
**Comparative evaluation results of SARS-CoV-2 antigen RDT missing the sensitivity criteria**

|                     |           | 97                               | 98                                                 | 99                                                                                       | 100                               | 101                     | 102                               | 103                                              | 104                                        | 105                                                               | 106                                                  | 107                                     | 108                                                        | 109                           | 110                             | 111                                          |   |
|---------------------|-----------|----------------------------------|----------------------------------------------------|------------------------------------------------------------------------------------------|-----------------------------------|-------------------------|-----------------------------------|--------------------------------------------------|--------------------------------------------|-------------------------------------------------------------------|------------------------------------------------------|-----------------------------------------|------------------------------------------------------------|-------------------------------|---------------------------------|----------------------------------------------|---|
| <b>Manufacturer</b> |           | Acro Biotech Inc                 | Aikang Diagnostics Co., Ltd.                       | Beijing Savant Biotechnology Co., Ltd                                                    | CerTestT Biotec S. L.             | Coris Bioconcept        | Hangzhou AllTest Biotech Co. Ltd. | Hangzhou Biotest Biotech Co., Ltd.               | Hangzhou Genesis Biocontrol Co., Ltd       | Hangzhou Realy Tech Co., Ltd.                                     | Inzek International Trading                          | Joinstar Biomedical Technology Co., Ltd | Joysbio (Tianjin) Biotechnology Co., Ltd.                  | Lionex GmbH                   | Medicon Co., Ltd.               | Mexacare GmbH Heidelberg                     |   |
| <b>Test name</b>    |           | Acro COVID-19 Antigen Rapid Test | SARS-CoV-2 Antigen Test Kit (Immunochromatography) | New Coronavirus (SARS-CoV-2) N Protein Detection Kit (Fluorescence Immunochromatography) | CerTest Biotec SARS-CoV-2 Ag Test | COVID-19 Ag Respi-Strip | COVID-19 AG AllTest               | Lumiratek SARS-CoV-2 Antigen Rapid Test Cassette | KalBili COVID-19 Antigen Rapid Test Device | Novel Coronavirus (SARS-Cov-2) Antigen Rapid Test Cassette (swab) | Bloazek medical COVID-19 Antigen Rapid Test Cassette | COVID-19 Antigen Rapid Test (Latex)     | Joysbio SARS-CoV-2 Antigen Rapid Test Kit (Colloidal Gold) | Lionex COVID-19 Ag Rapid Test | Trueline COVID-19 Ag Rapid Test | QuickTestCorona COVID-19 Antigen Schnelltest |   |
| <b>Panel 1 V1</b>   |           | <b>Panel 1 V2</b>                |                                                    | Panel 1 V1                                                                               | Panel 1 V2                        | Panel 1 V2              | Panel 1 V2                        | Panel 1 V1                                       | Panel 1 V1                                 | Panel 1 V2                                                        | Panel 1 V2                                           | Panel 1 V2                              | Panel 1 V2                                                 | Panel 1 V2                    | Panel 1 V2                      | Panel 1 V2                                   |   |
| <b>Pool Nr.</b>     | <b>Cq</b> | <b>Pool Nr.</b>                  | <b>Cq</b>                                          |                                                                                          |                                   |                         |                                   |                                                  |                                            |                                                                   |                                                      |                                         |                                                            |                               |                                 |                                              |   |
| 1                   | 17,55     | 1                                | 17,31                                              | 1                                                                                        | 1                                 | 0                       | 1                                 | 1                                                | 1                                          | 1                                                                 | 1                                                    | 1                                       | background                                                 | 1                             | background                      | 1                                            | 1 |
| 6                   | 20,20     | 2                                | 19,08                                              | 0                                                                                        | 1                                 | 0                       | 1                                 | 1                                                | 0                                          | 1                                                                 | 1                                                    | 1                                       | background                                                 | 1                             | background                      | 1                                            | 1 |
| 5                   | 20,28     | 3                                | 19,62                                              | 0                                                                                        | 0                                 | 0                       | 0                                 | 1                                                | 0                                          | 1                                                                 | 1                                                    | 1                                       | background                                                 | 1                             | background                      | 1                                            | 1 |
| 3                   | 20,38     | 5                                | 20,60                                              | 0                                                                                        | 0                                 | 0                       | 1                                 | 1                                                | 1                                          | 1                                                                 | 1                                                    | 1                                       | background                                                 | 1                             | background                      | 1                                            | 1 |
| 2                   | 20,54     | 4                                | 20,61                                              | 0                                                                                        | 0                                 | 0                       | 1                                 | 1                                                | 1                                          | 1                                                                 | 1                                                    | 1                                       | background                                                 | 1                             | background                      | 1                                            | 1 |
| 4                   | 20,98     | 6                                | 21,21                                              | 0                                                                                        | 0                                 | 0                       | 1                                 | 1                                                | 0                                          | 1                                                                 | 1                                                    | 1                                       | background                                                 | 1                             | background                      | 1                                            | 1 |
| 7                   | 21,71     | 12                               | 22,12                                              | 0                                                                                        | 0                                 | 0                       | 0                                 | 0                                                | 0                                          | 1                                                                 | 1                                                    | 0                                       | background                                                 | 1                             | background                      | 0                                            | 0 |
| 12                  | 21,82     | 7                                | 22,15                                              | 0                                                                                        | 0                                 | 0                       | 0                                 | 0                                                | 0                                          | 0                                                                 | 1                                                    | 1                                       | background                                                 | 0                             | background                      | 1                                            | 1 |
| 8                   | 21,95     | 8                                | 22,32                                              | 0                                                                                        | 0                                 | 0                       | 0                                 | 0                                                | 0                                          | 1                                                                 | 0                                                    | 1                                       | background                                                 | 1                             | background                      | 0                                            | 0 |
| 9                   | 22,14     | 16                               | 22,88                                              | 1                                                                                        | 0                                 | 0                       | 0                                 | 0                                                | 0                                          | 1                                                                 | 0                                                    | 0                                       | background                                                 | 0                             | background                      | 1                                            | 0 |
| 11                  | 22,34     | 9                                | 23,13                                              | 0                                                                                        | 0                                 | 0                       | 0                                 | 0                                                | 0                                          | 0                                                                 | 1                                                    | 1                                       | background                                                 | 0                             | background                      | 1                                            | 1 |
| 16                  | 22,55     | 11                               | 23,13                                              | 0                                                                                        | 0                                 | 0                       | 0                                 | 0                                                | 0                                          | 0                                                                 | 0                                                    | 0                                       | background                                                 | 0                             | background                      | 1                                            | 0 |
| 10                  | 22,88     | 10                               | 23,21                                              | 1                                                                                        | 0                                 | 0                       | 0                                 | 0                                                | 0                                          | 1                                                                 | 0                                                    | 0                                       | background                                                 | 0                             | background                      | 0                                            | 0 |
| 13                  | 23,32     | 15                               | 24,38                                              | 0                                                                                        | 0                                 | 0                       | 0                                 | 0                                                | 0                                          | 0                                                                 | 0                                                    | 0                                       | background                                                 | 0                             | background                      | 0                                            | 0 |
| 17                  | 24,00     | 23                               | 24,45                                              | 0                                                                                        | 0                                 | 0                       | 0                                 | 0                                                | 0                                          | 0                                                                 | 0                                                    | 0                                       | background                                                 | 0                             | background                      | 0                                            | 0 |
| 23                  | 24,04     | 17                               | 24,81                                              | 0                                                                                        | 0                                 | 0                       | 0                                 | 0                                                | 0                                          | 0                                                                 | 0                                                    | 0                                       | background                                                 | 0                             | background                      | 0                                            | 0 |
| 15                  | 24,14     | 14                               | 24,97                                              | 0                                                                                        | 0                                 | 0                       | 0                                 | 0                                                | 0                                          | 0                                                                 | 0                                                    | 0                                       | background                                                 | 0                             | background                      | 0                                            | 1 |
| 14                  | 24,28     | 25                               | 25,07                                              | 0                                                                                        | 0                                 | 0                       | 0                                 | 0                                                | 0                                          | 0                                                                 | 0                                                    | 0                                       | background                                                 | 0                             | background                      | 1                                            | 0 |
| 27                  | 25,14     | 24                               | 25,20                                              | 0                                                                                        | 0                                 | 0                       | 0                                 | 0                                                | 0                                          | 0                                                                 | 0                                                    | 0                                       | background                                                 | 0                             | background                      | 0                                            | 0 |
| 24                  | 25,24     | 13                               | 25,29                                              | 0                                                                                        | 0                                 | 0                       | 0                                 | 0                                                | 0                                          | 0                                                                 | 0                                                    | 0                                       | background                                                 | 0                             | background                      | 0                                            | 0 |
| 31                  | 25,27     | 19                               | 25,45                                              | 0                                                                                        | 0                                 | 0                       | 0                                 | 0                                                | 0                                          | 0                                                                 | 0                                                    | 0                                       | background                                                 | 0                             | background                      | 0                                            | 0 |
| 18                  | 25,30     | 21                               | 25,95                                              | 0                                                                                        | 0                                 | 0                       | 0                                 | 0                                                | 0                                          | 0                                                                 | 0                                                    | 0                                       | background                                                 | 0                             | background                      | 0                                            | 0 |
| 26                  | 25,47     | 27                               | 26,12                                              | 0                                                                                        | 0                                 | 0                       | 0                                 | 0                                                | 0                                          | 0                                                                 | 0                                                    | 0                                       | background                                                 | 0                             | background                      | 0                                            | 0 |
| 19                  | 25,50     | 31                               | 26,24                                              | 0                                                                                        | 0                                 | 0                       | 0                                 | 0                                                | 0                                          | 0                                                                 | 0                                                    | 0                                       | background                                                 | 1                             | background                      | 0                                            | 0 |
| 21                  | 25,54     | 26                               | 26,32                                              | 0                                                                                        | 0                                 | 0                       | 0                                 | 0                                                | 0                                          | 0                                                                 | 0                                                    | 0                                       | background                                                 | 0                             | background                      | 0                                            | 0 |
| 22                  | 25,87     | 32                               | 26,64                                              | 0                                                                                        | 0                                 | 0                       | 0                                 | 0                                                | 0                                          | 0                                                                 | 0                                                    | 0                                       | background                                                 | 0                             | background                      | 0                                            | 0 |
| 20                  | 26,27     | 35                               | 26,66                                              | 0                                                                                        | 0                                 | 0                       | 0                                 | 0                                                | 0                                          | 0                                                                 | 0                                                    | 0                                       | background                                                 | 0                             | background                      | 0                                            | 0 |
| 32                  | 26,44     | 36                               | 27,05                                              | 0                                                                                        | 0                                 | 0                       | 0                                 | 0                                                | 0                                          | 0                                                                 | 0                                                    | 0                                       | background                                                 | 0                             | background                      | 0                                            | 0 |
| 35                  | 27,04     | 30                               | 27,24                                              | 0                                                                                        | 0                                 | 0                       | 0                                 | 0                                                | 0                                          | 0                                                                 | 0                                                    | 0                                       | background                                                 | 0                             | background                      | 0                                            | 0 |
| 28                  | 27,14     | 29                               | 27,34                                              | 0                                                                                        | 0                                 | 0                       | 0                                 | 0                                                | 0                                          | 0                                                                 | 0                                                    | 0                                       | background                                                 | 0                             | background                      | 0                                            | 0 |
| 29                  | 27,15     | 28                               | 27,41                                              | 0                                                                                        | 0                                 | 0                       | 0                                 | 0                                                | 0                                          | 0                                                                 | 0                                                    | 0                                       | background                                                 | 0                             | background                      | 0                                            | 0 |
| 40                  | 27,65     | 22                               | 27,42                                              | 0                                                                                        | 0                                 | 0                       | 0                                 | 0                                                | 0                                          | 0                                                                 | 0                                                    | 0                                       | background                                                 | 0                             | background                      | 0                                            | 0 |
| 34                  | 27,89     | 34                               | 27,82                                              | 0                                                                                        | 0                                 | 0                       | 0                                 | 0                                                | 0                                          | 0                                                                 | 0                                                    | 0                                       | background                                                 | 0                             | background                      | 0                                            | 0 |
| 36                  | 28,13     | 40                               | 28,19                                              | 0                                                                                        | 0                                 | 0                       | 0                                 | 0                                                | 0                                          | 0                                                                 | 0                                                    | 0                                       | background                                                 | 0                             | background                      | 0                                            | 0 |
| 38                  | 28,14     | 18                               | 28,33                                              | 0                                                                                        | 0                                 | 0                       | 0                                 | 0                                                | 0                                          | 0                                                                 | 0                                                    | 0                                       | background                                                 | 0                             | background                      | 0                                            | 0 |
| 42                  | 28,43     | 33                               | 28,92                                              | 0                                                                                        | 0                                 | 0                       | 0                                 | 0                                                | 0                                          | 0                                                                 | 0                                                    | 0                                       | background                                                 | 0                             | background                      | 0                                            | 0 |
| 30                  | 28,86     | 38                               | 29,36                                              | 0                                                                                        | 0                                 | 0                       | 0                                 | 0                                                | 0                                          | 0                                                                 | 0                                                    | 0                                       | background                                                 | 0                             | background                      | 0                                            | 0 |
| 33                  | 28,96     | 20                               | 29,46                                              | 0                                                                                        | 0                                 | 0                       | 0                                 | 0                                                | 0                                          | 0                                                                 | 0                                                    | 0                                       | background                                                 | 0                             | background                      | 0                                            | 0 |
| 44                  | 29,24     | 42                               | 29,48                                              | 0                                                                                        | 0                                 | 0                       | 0                                 | 0                                                | 0                                          | 0                                                                 | 0                                                    | 0                                       | background                                                 | 0                             | background                      | 0                                            | 0 |
| 25                  | 29,70     | 44                               | 29,51                                              | 0                                                                                        | 0                                 | 0                       | 0                                 | 0                                                | 0                                          | 0                                                                 | 0                                                    | 0                                       | background                                                 | 0                             | background                      | 0                                            | 1 |
| 39                  | 29,76     | 39                               | 30,12                                              | 0                                                                                        | 0                                 | 0                       | 0                                 | 0                                                | 0                                          | 0                                                                 | 0                                                    | 0                                       | background                                                 | 0                             | background                      | 0                                            | 0 |
| 45                  | 30,10     | 37                               | 30,13                                              | 0                                                                                        | 0                                 | 0                       | 0                                 | 0                                                | 0                                          | 0                                                                 | 0                                                    | 0                                       | background                                                 | 0                             | background                      | 0                                            | 0 |
| 41                  | 30,13     | 41                               | 30,14                                              | 0                                                                                        | 0                                 | 0                       | 0                                 | 0                                                | 0                                          | 0                                                                 | 0                                                    | 0                                       | background                                                 | 0                             | background                      | 0                                            | 0 |
| 37                  | 30,54     | 45                               | 31,19                                              | 0                                                                                        | 0                                 | 0                       | 0                                 | 0                                                | 0                                          | 0                                                                 | 0                                                    | 0                                       | background                                                 | 0                             | background                      | 0                                            | 0 |
| 43                  | 31,05     | 48                               | 31,19                                              | 0                                                                                        | 0                                 | 0                       | 0                                 | 0                                                | 0                                          | 0                                                                 | 0                                                    | 0                                       | background                                                 | 0                             | background                      | 0                                            | 0 |
| 46                  | 31,54     | 46                               | 31,34                                              | 0                                                                                        | 0                                 | 0                       | 0                                 | 0                                                | 0                                          | 0                                                                 | 0                                                    | 0                                       | background                                                 | 0                             | background                      | 0                                            | 0 |
| 48                  | 32,06     | 43                               | 31,61                                              | 0                                                                                        | 0                                 | 0                       | 0                                 | 0                                                | 0                                          | 0                                                                 | 0                                                    | 0                                       | background                                                 | 0                             | background                      | 0                                            | 0 |
| 47                  | 35,19     | 47                               | 34,55                                              | 0                                                                                        | 0                                 | 0                       | 0                                 | 0                                                | 0                                          | 0                                                                 | 0                                                    | 0                                       | background                                                 | 0                             | background                      | 0                                            | 0 |
| 49                  | 35,22     | 50                               | 35,83                                              | 0                                                                                        | 0                                 | 0                       | 0                                 | 0                                                | 0                                          | 0                                                                 | 0                                                    | 0                                       | background                                                 | 0                             | background                      | 0                                            | 0 |
| 50                  | 36,36     | 49                               | 36,04                                              | 0                                                                                        | 0                                 | 0                       | 0                                 | 0                                                | 0                                          | 0                                                                 | 0                                                    | 0                                       | background                                                 | 0                             | background                      | 0                                            | 0 |

|              |       | 112                                        | 113                   | 114                    | 115                                           | 116                                  | 117                              | 118                                       | 119                                 | 120                                   | 121                                | 122                                              |            |            |
|--------------|-------|--------------------------------------------|-----------------------|------------------------|-----------------------------------------------|--------------------------------------|----------------------------------|-------------------------------------------|-------------------------------------|---------------------------------------|------------------------------------|--------------------------------------------------|------------|------------|
| Manufacturer |       | nal von minden GmbH                        | Rapigen               | Servoprax              | Spring Healthcare Services SP zoo             | SureScreen Diagnostics Ltd           | TaiDoc Technology Corp.          | Unioninvest                               | VivaChek Biotech(Hangzhou ) Co.Ltd. | VivaChek Biotech(Hangzhou ) Co.Ltd.   | W.H.P.M, Inc                       | Xiamen Zhongsheng Langjie Biotechnology Co., Ltd |            |            |
| Test name    |       | dedicio Medical Test COVID-19 Ag plus Test | Biocredit COVID-19 Ag | Clartest Coronaantigen | SARS-Cov-2 Antigen Rapid Test Cassette (swab) | COVID-19 Antigen Rapid Test Cassette | FORA COVID-19 ANTIGEN RAPID TEST | Unibioscience COVID-19 Rapid Antigen Test | VivaDiag SARS-CoV-2 Ag Rapid Test   | VivaDiag Pro SARS-CoV-2 Ag Rapid Test | First SIGN SARS-CoV-2 Antigen Test | Covid-19 Antigen Test Cassette                   |            |            |
| Panel 1 V1   |       | Panel 1 V2                                 |                       | Panel 1 V2             | Panel 1 V1                                    | Panel 1 V1                           | Panel 1 V2                       | Panel 1 V2                                | Panel 1 V1                          | Panel 1 V1                            | Panel 1 V1                         | Panel 1 V2                                       | Panel 1 V2 | Panel 1 V2 |
| Pool Nr.     | Cq    | Pool Nr.                                   | Cq                    |                        |                                               |                                      |                                  |                                           |                                     |                                       |                                    |                                                  |            |            |
| 1            | 17,55 | 1                                          | 17,31                 | 1                      | 1                                             | 1                                    | 1                                | 1                                         | 0                                   | 1                                     | 1                                  | 1                                                | 1          | 1          |
| 6            | 20,20 | 2                                          | 19,08                 | 1                      | 0                                             | 1                                    | 1                                | 1                                         | 0                                   | 1                                     | 1                                  | 1                                                | 1          | 1          |
| 5            | 20,28 | 3                                          | 19,62                 | 1                      | 1                                             | 1                                    | 1                                | 1                                         | 0                                   | 1                                     | 1                                  | 1                                                | 0          | 0          |
| 3            | 20,38 | 5                                          | 20,60                 | 1                      | 1                                             | 1                                    | 1                                | 1                                         | 0                                   | 1                                     | 1                                  | 1                                                | 1          | 0          |
| 2            | 20,54 | 4                                          | 20,61                 | 1                      | 0                                             | 1                                    | 1                                | 1                                         | 0                                   | 1                                     | 1                                  | 1                                                | 1          | 0          |
| 4            | 20,98 | 6                                          | 21,21                 | 0                      | 0                                             | 1                                    | 0                                | 1                                         | 0                                   | 1                                     | 1                                  | 1                                                | 1          | 0          |
| 7            | 21,71 | 12                                         | 22,12                 | 0                      | 0                                             | 1                                    | 0                                | 1                                         | 0                                   | 0                                     | 1                                  | 1                                                | 0          | 0          |
| 12           | 21,82 | 7                                          | 22,15                 | 0                      | 0                                             | 1                                    | 0                                | 1                                         | 0                                   | 0                                     | 1                                  | 1                                                | 0          | 0          |
| 8            | 21,95 | 8                                          | 22,32                 | 0                      | 0                                             | 1                                    | 0                                | 1                                         | 0                                   | 0                                     | 0                                  | 1                                                | 1          | 0          |
| 9            | 22,14 | 16                                         | 22,88                 | 1                      | 0                                             | 1                                    | 0                                | 0                                         | 0                                   | 1                                     | 0                                  | 0                                                | 0          | 0          |
| 11           | 22,34 | 9                                          | 23,13                 | 0                      | 0                                             | 0                                    | 0                                | 0                                         | 0                                   | 0                                     | 1                                  | 1                                                | 0          | 0          |
| 16           | 22,55 | 11                                         | 23,13                 | 0                      | 0                                             | 0                                    | 0                                | 0                                         | 0                                   | 0                                     | 0                                  | 0                                                | 0          | 0          |
| 10           | 22,88 | 10                                         | 23,21                 | 0                      | 0                                             | 1                                    | 0                                | 0                                         | 0                                   | 0                                     | 1                                  | 0                                                | 0          | 0          |
| 13           | 23,32 | 15                                         | 24,38                 | 0                      | 0                                             | 1                                    | 0                                | 0                                         | 0                                   | 0                                     | 0                                  | 0                                                | 0          | 0          |
| 17           | 24,00 | 23                                         | 24,45                 | 0                      | 0                                             | 0                                    | 0                                | 0                                         | 0                                   | 0                                     | 0                                  | 0                                                | 0          | 0          |
| 23           | 24,04 | 17                                         | 24,81                 | 0                      | 0                                             | 0                                    | 0                                | 0                                         | 0                                   | 0                                     | 0                                  | 0                                                | 0          | 0          |
| 15           | 24,14 | 14                                         | 24,97                 | 0                      | 0                                             | 0                                    | 0                                | 0                                         | 0                                   | 0                                     | 0                                  | 0                                                | 0          | 0          |
| 14           | 24,28 | 25                                         | 25,07                 | 0                      | 0                                             | 0                                    | 0                                | 0                                         | 0                                   | 0                                     | 0                                  | 0                                                | 0          | 0          |
| 27           | 25,14 | 24                                         | 25,20                 | 0                      | 0                                             | 0                                    | 0                                | 0                                         | 0                                   | 0                                     | 0                                  | 0                                                | 0          | 0          |
| 24           | 25,24 | 13                                         | 25,29                 | 0                      | 0                                             | 0                                    | 0                                | 0                                         | 0                                   | 0                                     | 0                                  | 0                                                | 0          | 0          |
| 31           | 25,27 | 19                                         | 25,45                 | 0                      | 0                                             | 0                                    | 0                                | 0                                         | 0                                   | 0                                     | 0                                  | 0                                                | 0          | 0          |
| 18           | 25,30 | 21                                         | 25,95                 | 0                      | 0                                             | 0                                    | 0                                | 0                                         | 0                                   | 0                                     | 0                                  | 0                                                | 0          | 0          |
| 26           | 25,47 | 27                                         | 26,12                 | 0                      | 0                                             | 0                                    | 0                                | 0                                         | 0                                   | 0                                     | 0                                  | 0                                                | 0          | 0          |
| 19           | 25,50 | 31                                         | 26,24                 | 0                      | 0                                             | 0                                    | 0                                | 0                                         | 0                                   | 0                                     | 0                                  | 0                                                | 0          | 0          |
| 21           | 25,54 | 26                                         | 26,32                 | 0                      | 0                                             | 0                                    | 0                                | 0                                         | 0                                   | 0                                     | 0                                  | 0                                                | 0          | 0          |
| 22           | 25,87 | 32                                         | 26,64                 | 0                      | 0                                             | 0                                    | 0                                | 0                                         | 0                                   | 0                                     | 0                                  | 0                                                | 0          | 0          |
| 20           | 26,27 | 35                                         | 26,66                 | 0                      | 0                                             | 0                                    | 0                                | 0                                         | 0                                   | 0                                     | 0                                  | 0                                                | 0          | 0          |
| 32           | 26,44 | 36                                         | 27,05                 | 0                      | 0                                             | 0                                    | 0                                | 0                                         | 0                                   | 0                                     | 0                                  | 0                                                | 0          | 0          |
| 35           | 27,04 | 30                                         | 27,24                 | 0                      | 0                                             | 0                                    | 0                                | 0                                         | 0                                   | 0                                     | 0                                  | 0                                                | 0          | 0          |
| 28           | 27,14 | 29                                         | 27,34                 | 0                      | 0                                             | 0                                    | 0                                | 0                                         | 0                                   | 0                                     | 0                                  | 0                                                | 0          | 0          |
| 29           | 27,15 | 28                                         | 27,41                 | 0                      | 0                                             | 0                                    | 0                                | 0                                         | 0                                   | 0                                     | 0                                  | 0                                                | 0          | 0          |
| 40           | 27,65 | 22                                         | 27,42                 | 0                      | 0                                             | 0                                    | 0                                | 0                                         | 0                                   | 0                                     | 0                                  | 0                                                | 0          | 0          |
| 34           | 27,89 | 34                                         | 27,82                 | 0                      | 0                                             | 0                                    | 0                                | 0                                         | 0                                   | 0                                     | 0                                  | 0                                                | 0          | 0          |
| 36           | 28,13 | 40                                         | 28,19                 | 0                      | 0                                             | 0                                    | 0                                | 0                                         | 0                                   | 0                                     | 0                                  | 0                                                | 0          | 0          |
| 38           | 28,14 | 18                                         | 28,33                 | 0                      | 0                                             | 0                                    | 0                                | 0                                         | 0                                   | 0                                     | 0                                  | 0                                                | 0          | 0          |
| 42           | 28,43 | 33                                         | 28,92                 | 0                      | 0                                             | 0                                    | 0                                | 0                                         | 0                                   | 0                                     | 0                                  | 0                                                | 0          | 0          |
| 30           | 28,86 | 38                                         | 29,36                 | 0                      | 0                                             | 0                                    | 0                                | 0                                         | 0                                   | 0                                     | 0                                  | 0                                                | 0          | 0          |
| 33           | 28,96 | 20                                         | 29,46                 | 0                      | 0                                             | 0                                    | 0                                | 0                                         | 0                                   | 0                                     | 0                                  | 0                                                | 0          | 0          |
| 44           | 29,24 | 42                                         | 29,48                 | 0                      | 0                                             | 0                                    | 0                                | 0                                         | 0                                   | 0                                     | 0                                  | 0                                                | 0          | 0          |
| 25           | 29,70 | 44                                         | 29,51                 | 0                      | 0                                             | 0                                    | 0                                | 0                                         | 0                                   | 0                                     | 0                                  | 0                                                | 0          | 0          |
| 39           | 29,76 | 39                                         | 30,12                 | 0                      | 0                                             | 0                                    | 0                                | 0                                         | 0                                   | 0                                     | 0                                  | 0                                                | 0          | 0          |
| 45           | 30,10 | 37                                         | 30,13                 | 0                      | 0                                             | 0                                    | 0                                | 0                                         | 0                                   | 0                                     | 0                                  | 0                                                | 0          | 0          |
| 41           | 30,13 | 41                                         | 30,14                 | 0                      | 0                                             | 0                                    | 0                                | 0                                         | 0                                   | 0                                     | 0                                  | 0                                                | 0          | 0          |
| 37           | 30,54 | 45                                         | 31,19                 | 0                      | 0                                             | 0                                    | 0                                | 0                                         | 0                                   | 0                                     | 0                                  | 0                                                | 0          | 0          |
| 43           | 31,05 | 48                                         | 31,19                 | 0                      | 0                                             | 0                                    | 0                                | 0                                         | 0                                   | 0                                     | 0                                  | 0                                                | 0          | 0          |
| 46           | 31,54 | 46                                         | 31,34                 | 0                      | 0                                             | 0                                    | 0                                | 0                                         | 0                                   | 0                                     | 0                                  | 0                                                | 0          | 0          |
| 48           | 32,06 | 43                                         | 31,61                 | 0                      | 0                                             | 0                                    | 0                                | 0                                         | 0                                   | 0                                     | 0                                  | 0                                                | 0          | 0          |
| 47           | 35,19 | 47                                         | 34,55                 | 0                      | 0                                             | 0                                    | 0                                | 0                                         | 0                                   | 0                                     | 0                                  | 0                                                | 0          | 0          |
| 49           | 35,22 | 50                                         | 35,83                 | 0                      | 0                                             | 0                                    | 0                                | 0                                         | 0                                   | 0                                     | 0                                  | 0                                                | 0          | 0          |
| 50           | 36,36 | 49                                         | 36,04                 | 0                      | 0                                             | 0                                    | 0                                | 0                                         | 0                                   | 0                                     | 0                                  | 0                                                | 0          | 0          |
